# Supplementary material for: Impact of legal status change on undocumented migrants’ health and well-being (Parchemins): protocol of a 4-year, prospective, mixed-methods study
Source: PubMed Central journal article supplement — BMJ Open. 2019 Jun 1;9(5):e028336. doi: 10.1136/bmjopen-2018-028336 (PMC6549650; doi:10.1136/bmjopen-2018-028336), 2019-06-01
Supplement: bmjopen-2018-028336.draft_revisions.pdf [file bmjopen-2018-028336.draft_revisions.pdf]

# BMJ Open

BMJ Open is committed to open peer review. As part of this commitment we make the peer review history of every article we publish publicly available.

When an article is published we post the peer reviewers' comments and the authors' responses online. We also post the versions of the paper that were used during peer review. These are the versions that the peer review comments apply to.

The versions of the paper that follow are the versions that were submitted during the peer review process. They are not the versions of record or the final published versions. They should not be cited or distributed as the published version of this manuscript.

BMJ Open is an open access journal and the full, final, typeset and author-corrected version of record of the manuscript is available on our site with no access controls, subscription charges or pay-per-view fees (<http://bmjopen.bmj.com>).

If you have any questions on BMJ Open's open peer review process please email [info.bmjopen@bmj.com](mailto:info.bmjopen@bmj.com)

# BMJ Open

## Impact of legal status change on undocumented migrants' health and well-being (Parchemins study): protocol of a 4-year prospective mixed-methods study

|                               |                                                                                                                                                                                                                                                                                                                                                                                                                                                                                                                                                                                                                                                                                                                                                                                                                                                                                                                                                                                                                                                                 |
|-------------------------------|-----------------------------------------------------------------------------------------------------------------------------------------------------------------------------------------------------------------------------------------------------------------------------------------------------------------------------------------------------------------------------------------------------------------------------------------------------------------------------------------------------------------------------------------------------------------------------------------------------------------------------------------------------------------------------------------------------------------------------------------------------------------------------------------------------------------------------------------------------------------------------------------------------------------------------------------------------------------------------------------------------------------------------------------------------------------|
| Journal:                      | <i>BMJ Open</i>                                                                                                                                                                                                                                                                                                                                                                                                                                                                                                                                                                                                                                                                                                                                                                                                                                                                                                                                                                                                                                                 |
| Manuscript ID                 | bmjopen-2018-028336                                                                                                                                                                                                                                                                                                                                                                                                                                                                                                                                                                                                                                                                                                                                                                                                                                                                                                                                                                                                                                             |
| Article Type:                 | Protocol                                                                                                                                                                                                                                                                                                                                                                                                                                                                                                                                                                                                                                                                                                                                                                                                                                                                                                                                                                                                                                                        |
| Date Submitted by the Author: | 03-Dec-2018                                                                                                                                                                                                                                                                                                                                                                                                                                                                                                                                                                                                                                                                                                                                                                                                                                                                                                                                                                                                                                                     |
| Complete List of Authors:     | <p>Burton-Jeangros, Claudine; University of Geneva<br/>         Courvoisier, Delphine; Geneva University Hospitals, Division of clinical epidemiology<br/>         Duvoisin, Aline; University of Geneva<br/>         Ferro-Luzzi, Giovanni; University of Geneva<br/>         Bodenmann, Patrick; University of Lausanne, Departement of Ambulatory Care and Community Medicine<br/>         Chauvin, Pierre; Inserm, UMRS 1136, Pierre Louis Institute of Epidemiology and Public Health, Department of Social Epidemiology; Université Pierre et Marie Curie-Paris6 , UMRS 1136<br/>         Guessous, Idris; University Hospitals of Geneva, Community medicine, primary care and emergency<br/>         Wolf, Hans; University of Geneva<br/>         Cullati, Stéphane; University Hospitals of Geneva, Quality of Care Service; University of Geneva, Institute of Demographic and Life Course Studies<br/>         Jackson, Yves; Hôpitaux Universitaires de Genève et Université de Genève, ; Geneva University Hospitals and University of Geneva</p> |
| Keywords:                     | undocumented migrant, migration, health, wellbeing, regularization                                                                                                                                                                                                                                                                                                                                                                                                                                                                                                                                                                                                                                                                                                                                                                                                                                                                                                                                                                                              |
|                               |                                                                                                                                                                                                                                                                                                                                                                                                                                                                                                                                                                                                                                                                                                                                                                                                                                                                                                                                                                                                                                                                 |

SCHOLARONE™  
Manuscripts

1  
2  
3 **Impact of legal status change on undocumented migrants' health and well-being (Parchemins study):**  
4 **protocol of a 4-year prospective mixed-methods study.**  
5

6  
7 Claudine Burton-Jeangros<sup>1,2</sup>, Delphine S. Courvoisier<sup>3</sup>, Aline Duvoisin<sup>1</sup>, Giovanni Ferro-Luzzi<sup>4,5</sup>, Patrick  
8 Bodenmann<sup>6</sup>, Pierre Chauvin<sup>7</sup>, Idris Guessous<sup>8</sup>, Hans Wolff<sup>9</sup>, Stéphane Cullati<sup>1,2</sup>, Yves Jackson<sup>8</sup>  
9

10  
11 <sup>1</sup> Institute of sociological research, University of Geneva, Switzerland

12 <sup>2</sup> Swiss NCCR 'LIVES—Overcoming Vulnerability: Life Course Perspectives', University of Geneva, Switzerland

13 <sup>3</sup> Department of general internal medicine, rehabilitation and geriatrics, University of Geneva, Switzerland

14 <sup>4</sup> Geneva school of business administration, HES-SO, University of Applied Sciences and Arts Western  
15 Switzerland

16 <sup>5</sup> Geneva school of economics and management, University of Geneva, Switzerland

17 <sup>6</sup> Vulnerable population center, Department of ambulatory care and community medicine, Lausanne University  
18 Hospital & University of Lausanne, Switzerland

19 <sup>7</sup> Department of social epidemiology, Sorbonne University, Paris, France

20 <sup>8</sup> Division of primary care medicine, Geneva University Hospitals and University of Geneva, Switzerland

21 <sup>9</sup> Division of prison health, Geneva University Hospitals and University of Geneva, Switzerland

22  
23  
24  
25  
26  
27  
28 **Contact**

29 Yves Jackson

30 Division of primary care medicine Geneva University Hospitals

31 Rue Gabrielle-Perret-Gentils 6, 1211 Geneva, Switzerland

32 Phone: +41 22 372 96 56

33 Yves.jackson@hcuge.ch

34  
35  
36  
37  
38 **Abstract**

39 **Introduction**

40  
41  
42 Migrants without residency permit, known as undocumented, represent a growing proportion of the global  
43 migration stock. They tend to live in precarious conditions and to be exposed to an accumulation of adverse  
44 determinants of health. Only scarce evidence exists on the social, economic and living conditions-related  
45 factors influencing their health status and wellbeing. No study has assessed the impact of legal status  
46 regularization. The Parchemins study is the first prospective mixed-methods study aiming at measuring the  
47 impact on health and well-being of a regularization policy on undocumented migrants in Europe.  
48  
49

50  
51  
52 **Methods and analysis**

53  
54 The Parchemins study will compare self-rated health and satisfaction with life in a group of undocumented  
55 migrants who receive a residency permit (intervention group) with a group of undocumented migrants who are  
56 not eligible for regularization (control group) in Geneva, Switzerland. Data collection will consist of  
57 standardized questionnaires complemented by semi-directed interviews in a sub-sample of migrants qualifying  
58  
59  
60

1  
2  
3 for regularization. The baseline data will be collected just before or during the regularization and participants  
4 will subsequently be followed-up yearly for three years. The quantitative part explores variables about health  
5 (i.e. health status, occupational health, health seeking behaviors, access to care, healthcare utilization),  
6 wellbeing (measured by satisfaction with different dimensions of life), living conditions (i.e. employment,  
7 accommodation, social support) and economic situation (income, expenditures). Several confounders including  
8 sociodemographic characteristics and migration history will be collected. The qualitative part will explore  
9 longitudinally the experience of change in legal status at individual and family levels.  
10  
11  
12  
13

#### 14 Ethics and dissemination

15  
16  
17 This study was approved by the Ethics Committee of Geneva Canton, Switzerland (CCER 2017-00897). All  
18 participants will provide informed consent. Results will be shared with migrant communities and NGOs  
19 supporting undocumented migrants and disseminated in scientific journals and in conferences. Fully  
20 anonymized data will be made available to researchers.  
21  
22  
23

#### 24 Article Summary

25  
26 - The Parchemins study is the first of its kind in Europe to explore the effects of obtaining a residency permit  
27 (regularization) in undocumented migrants in Europe, an understudied and hard to reach group of population.  
28 The study is embedded into a pilot public policy program aiming at granting legal status to undocumented  
29 migrants in Geneva.  
30  
31

32  
33 - The broad perspective including health and wellbeing outcomes, adding to the prospective and mixed-  
34 methods approaches will allow generating a comprehensive understanding of factors operating across time on  
35 health and wellbeing.  
36  
37

38  
39 - The qualitative part will provide further insights into individual and family experiences in parting with their  
40 undocumented status and facing the new challenges that regularization entails.  
41  
42

43  
44 - The main limitation will be the risk of attrition in the control group considering the harsh and unpredictable  
45 living context of such migrants. The study is designed to minimize such risk by selecting undocumented  
46 migrants having a relatively stable personal situation.  
47

48 Keywords: undocumented migrants, irregular migration, health, wellbeing, regularization  
49

#### 50 Introduction

51  
52 Undocumented or irregular migration is defined as “*movements that takes place outside the regulatory norms*  
53 *of the sending, transit and receiving countries*”.<sup>1</sup> It results from overstaying after temporary residency permit  
54 expiration, asylum claim refusal or entering the country without valid migration documentation.<sup>1,2</sup> There were  
55 20-30 million undocumented migrants (UM) worldwide in 2010.<sup>3</sup> In the United States, UM from Latin America  
56 increased from 8.4 in 2000 to 11.1 million in 2011, including 4.5 million children.<sup>4</sup> Europe hosted 1.9 to 3.8  
57  
58  
59  
60

1  
2  
3 million UM in 2008 and the most recent estimates point to 180'000-520'000 and 58'000-105'000 UM in  
4 Germany and Switzerland, respectively.<sup>5-7</sup>  
5

### 6 7 *A vulnerable population* 8

9 The lack of legal residency permit interacts with social, political and economic factors to create multi-  
10 dimensional vulnerability among UM.<sup>8,9</sup> In most European countries, they face significant post-migration  
11 difficulties in the context of restrictive immigration policies and lack of labor protection<sup>2,10</sup>. Many are  
12 employed in low-skills and precarious 3D (dangerous, dirty and degrading) jobs and are exposed to abuse,  
13 exploitation and occupational hazards.<sup>11-14</sup> Access to other basic commodities and services such as housing,  
14 education and training, food and legal protection in case of harm or abuse is usually arduous and precarious.<sup>10</sup>  
15  
16  
17  
18  
19

20  
21 When compared to the resident and the regular migrants' populations, self-rated physical and mental health is  
22 consistently and significantly poorer among UM in Europe.<sup>16,17</sup> In a study conducted in 11 countries, 23% of  
23 women and 34% of men, including those in the youngest age groups, rated their health as poor or very poor.<sup>12</sup>  
24 UM present high prevalence of chronic conditions in primary care settings, notably of metabolic, cardiovascular  
25 and psychiatric origins.<sup>16,18-22</sup> Several infectious diseases are more prevalent than in the resident population  
26 such as tuberculosis and Chagas disease, which relates more to geographic origins than to the legal status.<sup>23,24</sup>  
27 No comparative data exist on the mortality rate ratio of UM compared to the general population but external  
28 (including accidents and suicides) and circulatory causes of death were 3.6 and 2.2 times more prevalent in a  
29 sample of UM than in the general Swedish population, respectively.<sup>25</sup>  
30  
31  
32  
33  
34

35 Undocumented migrants in Europe face limited opportunities to respond to their healthcare needs with  
36 barriers to healthcare operating at different levels.<sup>12,26-28</sup> Legal entitlement to receive medical care within the  
37 public healthcare system varies considerably between countries. A majority of countries restricts access to  
38 emergency situations exclusively.<sup>29,30</sup> Non-governmental organizations (NGOs) play a subsidiary role but  
39 services provided are generally of limited extent and do not cover the full range of health needs.<sup>12</sup> Access to  
40 costly treatments in the absence of formal entitlement to healthcare is frequently restricted, which entails  
41 significant health consequences, notably in the context of severe chronic diseases such as HIV/AIDS infection.<sup>31</sup>  
42  
43  
44  
45  
46  
47  
48  
49  
50  
51  
52  
53  
54  
55  
56  
57  
58  
59  
60

60 In Switzerland, the 26 cantons have a large autonomy and have the responsibility to supervise and manage  
their public healthcare system.<sup>41</sup> UM are legally entitled to purchase the mandatory basic health insurance

1  
2  
3 (which grants access to standard healthcare) but lack of awareness, financial and administrative barriers as well  
4 as fear of denunciation contribute to the estimated 10-20% insurance coverage.<sup>42,43</sup> Swiss cantons have  
5 implemented different policies to bridge this access gap. Geneva and Vaud provide health services within the  
6 public healthcare system which are complemented by other services (food, shelter) provided by NGOs.<sup>42</sup> Yet,  
7 previous studies showed that UM in Geneva tended to delay seeking care, notably for preventive  
8 interventions.<sup>38</sup>  
9  
10  
11

### 12 13 *Regularization policies*

14 Several regularization programs have been implemented in Europe and an estimated 1.8 million  
15 undocumented migrants were granted a residency permit between 2002 and 2008.<sup>2</sup> Switzerland has never  
16 implemented large-scale programs but a handful of individual applications (mainly through NGOs or lawyers'  
17 services) have been successful to varying degrees depending on the canton. Residency permits have been  
18 granted mainly for humanitarian motives, in case of severe medical needs, long stay and satisfactory  
19 integration, absence of criminal record and financial autonomy.<sup>5</sup> In 2017, the Canton of Geneva implemented  
20 a two-year pilot regularization program (Operation Papyrus) aiming at granting one-year residency permits to  
21 undocumented migrants meeting the following criteria: a) stay of 10 years for individuals or 5 years for families  
22 with school-aged children; b) basic French proficiency; c) sufficient financial resources; d) lack of criminal  
23 record other than related to the residency permit.<sup>44</sup> The program integrates civil society actors (workers'  
24 unions, NGOs) that act as gatekeepers between UM and the Canton authorities, and support UM with the  
25 administrative process leading to regularization.  
26  
27  
28  
29  
30  
31  
32

33 The impact of regularization policy on UM health, well-being, living conditions and economic situation have  
34 rarely been studied in Europe. Scarce evidence shows improved access to legal employment, social welfare  
35 and insurances with better housing and educational opportunities.<sup>45</sup> Negative effects included enhanced  
36 professional competition associated with the lack of recognition of pre-migration professional qualifications. In  
37 Italy, the 2007 amnesty policy was associated with a 1.2 to 2.7% point decline in low birth weight prevalence  
38 within the migrant population eligible for regularization.<sup>46</sup> In the USA, the Deferred Action for Children Arrival  
39 act (DACA) implemented in 2012 allowed around 800'000 undocumented young people to be temporarily  
40 regularized. Studies found a decline in psychological distress, improvements in self-esteem, wellbeing, and  
41 social support and pointed to beneficial trans-generational effects on children mental health.<sup>47-49</sup> No study has  
42 prospectively explored the impact of legal status change on health and wellbeing while taking into account UM  
43 living and working conditions.  
44  
45  
46  
47  
48  
49

### 50 51 *Gaps in the existing literature*

52 While the development of knowledge about refugees' health is accelerating, research on UM health lags  
53 behind.<sup>28,50</sup> The number and quality of studies being limited, there are some major gaps in the current  
54 knowledge about UM health and wellbeing and their relationship to living and economic conditions in Europe.  
55  
56  
57  
58  
59  
60

1  
2  
3 Most studies have been conducted in healthcare settings, thus entailing a systematic selection bias restricting  
4 their generalizability, and are cross-sectional or retrospective, which hampers the ability to measure changes  
5 over time and to identify causal relationships.<sup>12 16 17 26 35 38 51-55</sup> Most studies in the literature are  
6 monodisciplinary, rely on a single methodology, typically measure a limited range of health indicators and  
7 usually overlook the wellbeing dimension. These limitations restrict the ability to foster a comprehensive  
8 understanding of the complexity and the dynamics of health and wellbeing evolution after regularization in a  
9 longitudinal perspective taking into account the interactions between medical, social, legal and economic  
10 factors.  
11  
12  
13  
14

15  
16 A second gap pertains to the lack of in-depth understanding of the impact of legal status change  
17 (regularization) on the health and living conditions of individual migrants but also of the rest of their family.<sup>13 16</sup>  
18 <sup>26 35 36 38 43</sup> In particular, there is a lack of evidence about how UM interpret the transformation of their living  
19 conditions during and after regularization and the ambivalent individual and family consequences of migration  
20 and regularization clearly need to be better understood.<sup>56</sup> This again calls for the collection of longitudinal  
21 data.<sup>56 57</sup> The underdevelopment of research on transnational UM families mirrors the limited interest from  
22 policymakers.<sup>56</sup>  
23  
24  
25  
26

### 27 *Theoretical perspectives*

28  
29  
30 To address the limitations of the available research, our research design is supported by two main theoretical  
31 perspectives allowing assessing the role of UM regularization.  
32  
33

- 34 (1) The perspective of wellbeing and quality of life (QoL) is typically articulated with the social determinants of  
35 health framework promoted among others by the World Health Organization. Indeed the model developed  
36 by the Commission on the social determinants of health maps the multiple factors that affect equity in  
37 both health and wellbeing.<sup>58</sup> Growing interest for wellbeing is evidenced by the Organization for Economic  
38 Co-operation and Development (OCDE) framework that associates objective indicators of material  
39 conditions with QoL indicators in different domains (including housing, education, income, etc.).<sup>59 60</sup> This  
40 framework is particularly relevant to assess the situation of newly regularized migrants, along the idea that  
41 QoL reflects the gap between individuals' actual situation and that to which they aspire.<sup>61</sup> We can  
42 hypothesize that UM wellbeing might be higher than that of Swiss residents with similar levels of  
43 resources. The wellbeing approach thus allows examining the complex interactions between living  
44 conditions and health outcomes, while taking into account the role of expectations in those domains.  
45  
46 (2) The dynamic approach of the life course will allow examining UM trajectories both retrospectively and  
47 prospectively. Considering how much stress and uncertainty the absence of legal documents generates,  
48 regularization represents a major transition or a turning point. At the same time, the acquisition of a legal  
49 status can bring mixed consequences, including both positive (elimination of the deportation risk, better  
50 housing) and negative (new financial constraints like taxes, competition on the labor market) influences.  
51  
52 The life course perspective will be used to assess how regularization modifies the balance between  
53 vulnerability and resources.<sup>62</sup> We particularly hypothesis that the acquisition of a legal status may impact  
54  
55  
56  
57  
58  
59  
60

1  
2  
3 differentially the resources of undocumented individuals and families, be they functional resources and  
4 reserves<sup>63</sup>: some positive influences may favor the stabilization of their social and economic resources ,  
5 and ultimately improve their economic resources by giving them legal access to job opportunities in the  
6 labor market; however, some negative influences may also occur and impede the constitution of economic  
7 reserves, thus limiting their capacity to absorb the consequences of shocks and adverse events at different  
8 points of their life course.  
9  
10  
11

### 12 *Objectives of the study and research questions*

13  
14  
15 This study aims to measure how regularization impacts the health and wellbeing of UM in Geneva. To reach  
16 this goal, five research questions have been formulated:  
17

- 18 1. What are the living conditions of UM living in Geneva?
- 19 2. What are the health status, including the mental and somatic dimensions, and well-being of UM living  
20 in Geneva?
- 21 3. What are the health-seeking behaviors, healthcare utilization, including emergency services, and  
22 renouncement to medical care, among UM living in Geneva?
- 23 4. What is the impact of regularization on their health and well-being and its relationship with changes in  
24 living conditions?
- 25 5. How do contextual factors shape the experience of transitioning towards legality for undocumented  
26 individuals and families?  
27  
28  
29  
30  
31  
32

### 33 *Methods and data analysis*

#### 34 *Design*

35  
36  
37 This prospective mixed-methods observational study compares a group of undocumented migrants undergoing  
38 regularization with a group of migrants not eligible for regularization. A nested qualitative longitudinal study  
39 focuses on a sub-sample of individuals undergoing regularization.  
40  
41  
42

43  
44 The research plan is organized to respond to the set of research questions developed on the following  
45 hypothesis: i) UM endure deleterious living and economic conditions compared to the general population  
46 which has an impact on health and wellbeing; ii) regularization of the legal status impacts on health and  
47 wellbeing; iii) differences in health and wellbeing after regularization are mediated by changes in living and  
48 economic conditions and iv) regularization may cause vulnerability in health and living conditions.  
49  
50  
51

#### 52 *Setting*

53  
54 This study takes place in Canton Geneva located in French-speaking Western Switzerland. The resident  
55 population is 500'000 including 10-15'000 undocumented migrants.  
56  
57

#### 58 *Eligibility criteria*

#### 59 *Inclusion criteria*

60



1  
2  
3 Migrants aged  $\geq 18$  years, originating from countries outside the European Union or European Free Trade  
4 Association, living in Geneva without a valid residency permit (undocumented) for at least 3 years, who plan to  
5 stay in Geneva at least 3 more years, have no criminal record and are not registered as asylum seekers, are  
6 eligible to participate. They are categorized into two groups: those undergoing the regularization process or  
7 who have been regularized for less than three months (intervention group) and those who do not meet the  
8 regularization eligibility criteria or are unwilling to apply for regularization (control group).  
9  
10  
11

#### 12 Exclusion criteria

13  
14  
15 The inability to communicate in one of the languages spoken by investigators (French, Spanish, Portuguese,  
16 English, Albanian, and Italian) is the only exclusion criteria.  
17  
18

#### 19 Intervention

20  
21 Participants eligible for legal status regularization (intervention group) will receive a residency permit within 3-  
22 6 months after the submission of their application to the Canton authorities. This process will take place during  
23 the first year of data collection. The information about permit acceptance will be collected through participants  
24 and the NGOs. This permit is renewable annually. In the unlikely occurrence of refusal, participants will be  
25 allocated to the control group.  
26  
27  
28

#### 29 Outcomes

##### 30 Primary outcome measure

31  
32 The primary outcome is self-rated health. It will be measured by comparing intra-group differences at baseline  
33 and after 3 years. Yearly measurements will allow for observing fluctuations in such differences. This item will  
34 be measured using the SF-12 question 1, a 5-points Likert scale<sup>64</sup>, whose large-scale use also allows for  
35 comparing the results with other groups of populations. We selected the main outcome for its prognostic value  
36 in terms of morbidity and mortality.<sup>65 66</sup>  
37  
38  
39  
40  
41  
42

##### 43 Secondary outcome measure

44  
45 The secondary outcome consists of self-reported satisfaction with current life as measured through the  
46 dimensions of living condition and economic situation at baseline and after three years. Each domain will be  
47 measured every year with a single question using a 10-points Likert scale ranging from 0=absolutely not  
48 satisfied to 10=absolutely satisfied. This will allow to measure key dimensions of the OCDE wellbeing  
49 framework and provide comparison with the resident population.<sup>60</sup>  
50  
51  
52  
53

##### 54 Additional variables under investigations

55  
56 The quantitative part explores four domains, i.e. personal and family characteristics, health, living conditions  
57 and employment and economic situation. Table 1 presents the main variables under study. These variables will  
58 be used as predictors for the main outcomes. We designed our questionnaire in order to provide data that  
59  
60

1  
2  
3 allow for comparisons with the general population living in Switzerland, by using questions from population  
4 surveys such as the Household panel study or the Swiss Health Study.<sup>67 68</sup> For specific domains, we use  
5 validated measurement tools selected for their validity and reliability in non-clinical setting. Screening for  
6 depression and anxiety uses the PHQ-9 and GAD-7 scales, respectively.<sup>69 70</sup> Occupational mental health is  
7 assessed by using the Maslach Burnout inventory test, emotional exhaustion dimension.<sup>71</sup> We use The  
8 Pittsburgh Sleep Quality Index Sleep quality to evaluate quality of sleep.<sup>72</sup> We pretested our questionnaire with  
9 a sample of participants (n=5), allowing for iterative modifications.  
10  
11  
12  
13

#### 14 Qualitative part

15  
16  
17 The following themes will be covered during the semi-directed interviews: marital and family dynamics,  
18 including relationships with family members not living in Switzerland; experience of the regularization process  
19 and its positive and negative implications; perspectives and aspirations for the future; for parents: educational  
20 issues and aspirations for the children's future. The interview guide has been pretested with 5 persons.  
21  
22  
23

#### 24 Participant timeline

25  
26 Quantitative data will be collected by questionnaire at baseline and repeated annually during the following  
27 three year (4 waves in total). Questionnaires will be filled with participants in the intervention and the control  
28 groups. We restricted the follow-up to three years assuming that most changes in the domains under study will  
29 occur during the first two years, followed by a more stable situation. This restriction also aims to reduce the  
30 attrition rate. Qualitative interviews are also conducted at baseline (year 1) and then every year for three  
31 years. They are conducted at a different time from the quantitative data collection to avoid participants'  
32 fatigue.  
33  
34  
35  
36

#### 37 Sample size

38  
39  
40 Considering an effect size of 0.3 for the main health outcome (self-rated health), a type 1 error of 0.05 and a  
41 power of 0.8, the total sample size is 352, rounded up to 400 to account for the possible drop-out of  
42 participants over the follow-up.  
43  
44

45 The purposive qualitative nested study sampling includes 30 participants selected from the intervention group  
46 of UM eligible for regularization. The sample size of 30 is estimated to be sufficient to reach data saturation. To  
47 ensure the diversity of the sample, participants are recruited on the respectively absence or presence of  
48 children, while ensuring the diversity of the sample regarding origins, age, gender, etc.  
49  
50  
51

#### 52 Recruitment

53  
54 According to the local authorities, 1000-2000 UM could be eligible for the regularization policy and the total  
55 number of UM in Geneva amount to 10'000 to 15'000. Recruitment is based on two strategies. First, UM in  
56 Geneva are informed about the study by personal contacts at migrants' organizations partnering the study and  
57 NGOs acting at gatekeepers for "Operation Papyrus", during public meetings held in the community, at  
58  
59  
60

1  
2  
3 dedicated health centers attending for UM and through leaflets and a Facebook page. A direct phone line is  
4 accessible during office hours to respond to all enquiries. People interested in participating contact the  
5 investigators who present the study information and consent forms and engage in the first questionnaire  
6 passing if agreement is provided.  
7  
8

9  
10 The second strategy is based on phone contacts with potential participants identified in partner NGOs registries  
11 of UM. During the initial call, investigators present the study and offer to organize a first meeting to provide  
12 more in-depth information. In the absence of response, potential participants are recalled up to five times.  
13  
14

#### 15 Retention

16  
17 Undocumented migrants are highly mobile and can be lost during the follow-up. In order to account for this  
18 risk, the sample size has been increased by 12.5%. All participants undergoing the first round of data collection  
19 will be contacted yearly for the subsequent waves. In order to enhance retention into the study, the following  
20 strategies are implemented: a) providing a material incentive after each questionnaire passation; b) discussing  
21 the need for and gaining acceptance for the next contact after one year upon each encounter; c) recording a  
22 secondary phone number or email address to ensure participants are accessible. Moreover, partner NGOs  
23 inform communities of the importance of the follow-up. Contact for the following data collection will be made  
24 by phone with up to five recalls and use of email messaging in case of non-response. In order to facilitate  
25 participation and retention into the study, the field investigators can move to the preferred participant's  
26 location to pass the questionnaire.  
27  
28  
29  
30  
31  
32

33 Participants may withdraw from the study for any reason at any time. In case of withdrawal or loss to follow-  
34 up, all data will be included until the last participants' questionnaire for the analysis.  
35  
36

#### 37 Quantitative data collection

38  
39 The study questionnaire is administered face-to-face at the preferred participants' location in the community.  
40 This can be conducted in five languages. Data are recorded on a mobile tablet using Sphinx mobile® software  
41 (LeSphinx, France) and are immediately transferred on a secured server. Interviewers are trained and initially  
42 supervised by a senior staff during their first interviews.  
43  
44  
45  
46

#### 47 Qualitative data collection

48  
49 In the qualitative section, data are collected in semi-directed interviews with UM in the process of  
50 regularization. They are conducted in French, Spanish and English. Interviews are tape recorded and fully  
51 transcribed.  
52  
53

#### 54 Statistical analysis

55  
56 In a first step, we will compare the two groups (intervention vs. control) on all characteristics, using univariate  
57 analysis such as Fisher exact test for categorical variables and Wilcoxon rank sum test for continuous variables.  
58 This will allow determining the quality of the control group selection.  
59  
60

1  
2  
3 To study the evolution of health outcomes and living conditions over time, we will use multilevel linear models  
4 (logistic, Poisson, or Gaussian as appropriate depending on the specific outcome), including legal status  
5 (regularized vs. control) and adjusting for baseline characteristics to further account for group differences.  
6 Multilevel models account for the repeated nature of the data. To specifically focus on the different  
7 trajectories, these models will include both a random intercept and a random slope over time. Note that for  
8 rare dichotomous outcomes, we will probably need to restrict the number of covariates due to a number of  
9 events per variables below five per predictor. In that case, we will use two strategies. First, we will use  
10 propensity score adjustment, using all previously described covariates to compute the propensity score.  
11 Second, because the propensity score may not capture the importance of some confounders and lead to  
12 residual confounding, we will use a least absolute shrinkage and selection operator (LASSO) regression to  
13 determine which covariates are the most useful, before using only those covariates for adjustment.  
14  
15  
16  
17  
18  
19

#### 20 Qualitative data analysis

21  
22  
23 Thematic analyses of the transcriptions will be conducted with Atlas.ti ([www.atlasti.com](http://www.atlasti.com)), combining a set of  
24 codes defined along the interview guide and new codes inductively generated over the course of the analysis.  
25  
26

#### 27 Ethics and dissemination

28  
29 This study was approved by the Ethics Committee of Geneva Canton, Switzerland (CCER 2017-00897). All  
30 participants will provide informed consent. Results will be shared with migrant communities and NGOs  
31 supporting undocumented migrants and disseminated in scientific journals and in conferences. Fully  
32 anonymized data will be made available to researchers.  
33  
34  
35

#### 36 Discussion

37  
38 This mixed methods study aims to measure the impact of legal status change on health and wellbeing of UM  
39 taking in account living, employment and economic conditions. It will produce the first comprehensive and  
40 longitudinal evaluation of a policy response to irregular migration in Europe. The interdisciplinary approach  
41 warrants the generation of rich data about a complex phenomenon. Considering the contemporary political  
42 and scientific interest in issues pertaining to migration worldwide, this study is at the forefront to provide  
43 original, interdisciplinary and comprehensive evidence about an ill-researched population. The results  
44 generated will influence on how such issues are framed and discussed at local, national and international  
45 levels. Data will specifically inform about unmet health needs, expectations and resources of undocumented  
46 migrants, therefore allowing for guiding clinical and public health strategies in Switzerland and similar  
47 countries. This may allow for an opportunity to mitigate inequalities in health outcomes and in access to health  
48 services. Most importantly, this study will provide a safe environment to give a voice to a silent and  
49 underserved population.  
50  
51  
52  
53  
54  
55  
56

#### 57 References

58  
59 1. International Organization for Migration. World migration report 2018. Geneva: IOM, 2017.  
60

- 1  
2  
3 2. Kraler A, Rogoz M. Irregular migration in the European Union since the turn of the millennium –  
4 development, economic background and discussion. Database on Irregular Migration, Working paper  
5 11/2011. Vienna: International Centre for Migration Policy Development (ICMPD), 2011.  
6  
7
- 8 3. International Organization for Migration. World Migration Report 2010. Geneva: IOM, 2010.
- 9 4. Pew Hispanic Centre. A Nation of Immigrants. A Portrait of the 40 Million, Including 11 Million Unauthorized.  
10 Washington: Pew Research Centre, 2013.  
11
- 12 5. Morlok M, Oswald A, Meier H, et al. Les sans-papiers en Suisse en 2015. Bâle: BSS, 2016.
- 13 6. Vogel D, Kovacheva V, Prescott H. The size of the irregular migrant population in the European Union -  
14 counting the uncountable? *Int Migr* 2011;49(5):78-96.  
15
- 16 7. Vogel D. Update report Germany: Estimated number of irregular foreign residents in Germany (2014).  
17 Database on Irregular Migration. Bremen: University of Bremen, 2015.  
18
- 19 8. Willen SS. Migration, "illegality," and health: mapping embodied vulnerability and debating health-related  
20 deservingness. *Soc Sci Med* 2012;74(6):805-11.  
21
- 22 9. Fleischman Y, Willen SS, Davidovitch N, et al. Migration as a social determinant of health for irregular  
23 migrants: Israel as case study. *Soc Sci Med* 2015;147:89-97.  
24
- 25 10. Chauvin P, Simonnot N, Douay C, et al. Access to healthcare for people facing multiple vulnerability factors  
26 in 27 cities across 10 countries. Report on the social and medical data gathered in 2013 in eight  
27 European countries, Turkey and Canada. Paris: International network of Médecins du monde, 2014.  
28
- 29 11. Benach J, Muntaner C, Delclos C, et al. Migration and "low-skilled" workers in destination countries. *PLoS*  
30 *Med* 2011;8(6):e1001043.  
31
- 32 12. Chauvin P, Parizot I, Simonnot N. Access to healthcare for undocumented migrants in 11 European  
33 countries. In: healthcare. Eooat, ed. Paris: Médecins du Monde, 2009.  
34
- 35 13. Sousa E, Agudelo-Suarez A, Benavides FG, et al. Immigration, work and health in Spain: the influence of  
36 legal status and employment contract on reported health indicators. *Int J Public Health*  
37 2010;55(5):443-51.  
38
- 39 14. Ahonen EQ, Porthe V, Vazquez ML, et al. A qualitative study about immigrant workers' perceptions of their  
40 working conditions in Spain. *J Epidemiol Community Health* 2009;63(11):936-42.  
41
- 42 15. Aragona M, Pucci D, Mazzeti M, et al. Post-migration living difficulties as a significant risk factor for PTSD in  
43 immigrants: a primary care study. *Italian J Public Health* 2012;9(3):e7525-1.  
44
- 45 16. Kuehne A, Huschke S, Bullinger M. Subjective health of undocumented migrants in Germany - a mixed  
46 methods approach. *BMC Public Health* 2015;15:926.  
47
- 48 17. D'Egidio V, Mipatrini D, Massetti AP, et al. How are the undocumented migrants in Rome? Assessment of  
49 quality of life and its determinants among migrant population. *J Public Health* 2017;39(3):440-46.  
50
- 51 18. Jackson Y, Paignon A, Wolff H, et al. Health of undocumented migrants in primary care in  
52 Switzerland. *PLoS One* 2018; 13(7): e0201313  
53
- 54 19. Jackson Y, Castillo S, Hammond P, et al. Metabolic, mental health, behavioural and socioeconomic  
55 characteristics of migrants with Chagas disease in a non-endemic country. *Trop Med Int Health*  
56 2012;17(5):595-603.  
57  
58  
59  
60

- 1
- 2
- 3 20. Lindert J, Ehrenstein OS, Priebe S, et al. Depression and anxiety in labor migrants and refugees--a
- 4 systematic review and meta-analysis. *Soc Sci Med* 2009;69(2):246-57.
- 5
- 6 21. Myhrvold T, Smastuen MC. The mental healthcare needs of undocumented migrants: an exploratory
- 7 analysis of psychological distress and living conditions among undocumented migrants in Norway. *J*
- 8 *Clin Nurs* 2017;26(5-6):825-39. doi: 10.1111/jocn.13670
- 9
- 10 22. van de Sande JSO, van den Muijsenbergh M. Undocumented and documented migrants with chronic
- 11 diseases in Family Practice in the Netherlands. *Fam Pract* 2017;34(6):649-55.
- 12
- 13 23. Wolff H, Janssens JP, Bodenmann P, et al. Undocumented migrants in Switzerland: geographical origin
- 14 versus legal status as risk factor for tuberculosis. *J Immigr Minor Health* 2010;12(1):18-23.
- 15
- 16 24. Jackson Y, Getaz L, Wolff H, et al. Prevalence, clinical staging and risk for blood-borne transmission of
- 17 Chagas disease among Latin American migrants in Geneva, Switzerland. *PLoS Negl Trop Dis*
- 18 2010;4(2):e592.
- 19
- 20 25. Wahlberg A, Kallestal C, Lundgren A, et al. Causes of death among undocumented migrants in Sweden,
- 21 1997-2010. *Glob Health Action* 2014;7:24464.
- 22
- 23 26. Woodward A, Howard N, Wolffers I. Health and access to care for undocumented migrants living in the
- 24 European Union: a scoping review. *Health Policy Plan* 2014;29(7):818-30.
- 25
- 26 27. Suess A, Ruiz Perez I, Ruiz Azarola A, et al. The right of access to health care for undocumented migrants: a
- 27 revision of comparative analysis in the European context. *Eur J Public Health* 2014;24(5):712-20.
- 28
- 29 28. De Vito E, De Waure C, Specchia M, et al. Public health aspects of migrant health: a review of the evidence
- 30 on health status for undocumented migrants in the European Region. Copenhagen: World Health
- 31 Organisation (WHO) Regional Office for Europe, 2016.
- 32
- 33 29. Cuadra CB. Right of access to health care for undocumented migrants in EU: a comparative study of
- 34 national policies. *Eur J Public Health* 2012;22(2):267-71.
- 35
- 36 30. Karl-Trummer U, Novak-Zezula S, Metzler B. Access to health care for undocumented migrants in the EU: A
- 37 first landscape of NowHereland. *EuroHealth* 2010;16(1):13-16.
- 38
- 39 31. Perez-Molina JA, Pulido Ortega F. [Assessment of the impact of the new health legislation on illegal
- 40 immigrants in Spain: the case of human immunodeficiency virus infection]. *Enferm Infecc Microbiol*
- 41 *Clin* 2012;30(8):472-8.
- 42
- 43 32. Deblonde J, Sasse A, Del Amo J, et al. Restricted access to antiretroviral treatment for undocumented
- 44 migrants: a bottle neck to control the HIV epidemic in the EU/EEA. *BMC Public Health* 2015;15:1228.
- 45
- 46 33. Dauvrin M, Lorant V, Sandhu S, et al. Health care for irregular migrants: pragmatism across Europe: a
- 47 qualitative study. *BMC Res Notes* 2012;5:99.
- 48
- 49 34. Hudelson P, Perron NJ, Perneger TV. Measuring physicians' and medical students' attitudes toward caring
- 50 for immigrant patients. *Eval Health Prof* 2010;33(4):452-72.
- 51
- 52 35. Schoevers MA, Loeffen MJ, van den Muijsenbergh ME, et al. Health care utilisation and problems in
- 53 accessing health care of female undocumented immigrants in the Netherlands. *Int J Public Health*
- 54 2010;55(5):421-8.
- 55
- 56
- 57
- 58
- 59
- 60

- 1
- 2
- 3 36. Poduval S, Howard N, Jones L, et al. Experiences among undocumented migrants accessing primary care in
- 4 the United Kingdom: a qualitative study. *Int J Health Serv* 2015;45(2):320-33.
- 5
- 6 37. Casillas A, Bodenmann P, Epiney M, et al. The border of reproductive control: undocumented immigration
- 7 as a risk factor for unintended pregnancy in Switzerland. *J Immigr Minor Health* 2015;17(2):527-34.
- 8
- 9 38. Wolff H, Epiney M, Lourenco AP, et al. Undocumented migrants lack access to pregnancy care and
- 10 prevention. *BMC Public Health* 2008;8:93.
- 11
- 12 39. Martin Y, Collet TH, Bodenmann P, et al. The lower quality of preventive care among forced migrants in a
- 13 country with universal healthcare coverage. *Prev Med* 2014;59:19-24.
- 14
- 15 40. Mipatrini D, Addario SP, Bertollini R, et al. Access to healthcare for undocumented migrants: analysis of
- 16 avoidable hospital admissions in Sicily from 2003 to 2013. *Eur J Public Health* 2017;27(3):459-64.
- 17
- 18 41. De Pietro C, Camenzind P, Sturny I, et al. Switzerland: Health System Review. *Health Syst Transit*
- 19 2015;17(4):1-288
- 20
- 21 42. National platform for undocumented migrants access to care. Access to care for vulnerable populations in
- 22 Switzerland 2014 [Available from: [https://www.sante-sans-](https://www.sante-sans-papiers.ch/FR/files/acces_aux_soins_des_vulnerables_web--4-.pdf)
- 23 [papiers.ch/FR/files/acces\\_aux\\_soins\\_des\\_vulnerables\\_web--4-.pdf](https://www.sante-sans-papiers.ch/FR/files/acces_aux_soins_des_vulnerables_web--4-.pdf) accessed 30.12.2017.
- 24
- 25 43. Wyssmüller C, Efonayi-Mäder D. Undocumented Migrants: their needs and strategies for accessing health
- 26 care in Switzerland: Country Report on People & Practices Bern: Swiss Forum for Population and
- 27 Migration Studies, 2011.
- 28
- 29 44. Geneva Canton Council. Opération Papyrus 2017 [Available from: [https://www.ge.ch/dossier/operation-](https://www.ge.ch/dossier/operation-papyrus)
- 30 [papyrus](https://www.ge.ch/dossier/operation-papyrus) accessed 10.01.2017.
- 31
- 32 45. Kraler A, Reichel D, König A, et al. Feasibility Study on the Labour Market Trajectories of Regularised
- 33 Immigrants within the European Union (REGANE I). Vienna: International Centre for Migration Policy
- 34 Development (ICMPD), 2014.
- 35
- 36 46. Salmasi L, Pieroni L. Immigration policy and birth weight: Positive externalities in Italian law. *J Health Econ*
- 37 2015;43:128-39.
- 38
- 39 47. Venkataramani AS, Shah SJ, O'Brien R, et al. Health consequences of the US Deferred Action for Childhood
- 40 Arrivals (DACA) immigration programme: a quasi-experimental study. *Lancet Public Health*
- 41 2017;2(4):e175-e81.
- 42
- 43 48. Siemons R, Raymond-Flesch M, Auerswald CL, et al. Coming of Age on the Margins: Mental Health and
- 44 Wellbeing Among Latino Immigrant Young Adults Eligible for Deferred Action for Childhood Arrivals
- 45 (DACA). *J Immigr Minor Health* 2017;19(3):543-51.
- 46
- 47 49. Hainmueller J, Lawrence D, Marten L, et al. Protecting unauthorized immigrant mothers improves their
- 48 children's mental health. *Science* 2017;357(6355):1041-44.
- 49
- 50 50. Rechel B, Mladovsky P, Ingleby D, et al. Migration and health in an increasingly diverse Europe. *Lancet*
- 51 2013;381(9873):1235-45.
- 52
- 53 51. Teunissen E, Van Bavel E, Van Den Driessen Mareeuw F, et al. Mental health problems of undocumented
- 54 migrants in the Netherlands: A qualitative exploration of recognition, recording, and treatment by
- 55 general practitioners. *Scand J Prim Health Care* 2015;33(2):82-90.
- 56
- 57
- 58
- 59
- 60

- 1  
2  
3 52. Sebo P, Jackson Y, Haller DM, et al. Sexual and reproductive health behaviors of undocumented migrants in  
4 Geneva: a cross sectional study. *J Immigr Minor Health* 2011;13(3):510-7.  
5  
6 53. Schoevers MA, van den Muijsenbergh ME, Lagro-Janssen AL. Self-rated health and health problems of  
7 undocumented immigrant women in the Netherlands: a descriptive study. *J Public Health Policy*  
8 2009;30(4):409-22.  
9  
10 54. Rondet C, Cornet P, Kaoutar B, et al. Depression prevalence and primary care among vulnerable patients at  
11 a free outpatient clinic in Paris, France, in 2010: results of a cross-sectional survey. *BMC Fam Pract*  
12 2013;14:151.  
13  
14 55. Castaneda H. Illegality as risk factor: a survey of unauthorized migrant patients in a Berlin clinic. *Soc Sci Med*  
15 2009;68(8):1552-60.  
16  
17 56. Glick J. Connecting Complex Processes: A Decade of Research on Immigrant Families. *J Marriage Fam*  
18 2010;72(3):498-515.  
19  
20 57. Clark R, Glick J, Bures R. Immigrant Families Over the Life Course: Research Directions and Needs. *J Fam*  
21 *Issues* 2009;30(6):852-72.  
22  
23 58. Commission on the social determinants of health. Closing the gap in a generation: health equity through  
24 action on the social determinants of health. Final Report of the Commission on Social Determinants of  
25 Health. World Health Organization, 2008.  
26  
27 59. Swiss Federal Bureau of Statistics. Measuring well-being 2018 [Available from:  
28 <https://www.bfs.admin.ch/bfs/fr/home/statistiques/themes-transversaux/mesure-bien-etre.html>  
29 accessed 07.03.2018.  
30  
31 60. OECD. Measuring Well-being and Progress: Well-being Research [Available from:  
32 <http://www.oecd.org/statistics/measuring-well-being-and-progress.htm> accessed 22.02.2018.  
33  
34 61. Fry P. Guest Editorial: Aging and Quality of Life (QOL)—The Continuing Search for Quality of Life Indicators.  
35 *Int J Aging Hum Dev* 2000;50(4):245-61.  
36  
37 62. Spini D, Bernardi L, Oris M. Vulnerability Across the Life Course. *Res Hum Dev* 2017;14(1):1-4.  
38  
39 63. Cullati S, Kliegel M, Widmer E. Development of reserves over the life course and onset of vulnerability in  
40 later life. *Nature Hum Behav* 2018;2:551-58.  
41  
42 64. Ware J, Jr., Kosinski M, Keller SD. A 12-Item Short-Form Health Survey: construction of scales and  
43 preliminary tests of reliability and validity. *Med Care* 1996;34(3):220-33.  
44  
45 65. Benyamini Y, Idler Y. Community Studies Reporting Association between Self-Rated Health and  
46 Mortality: Additional Studies, 1995 to 1998. *Res Aging* 1999;21(3):392-401.  
47  
48 66. DeSalvo KB, Bloser N, Reynolds K, et al. Mortality Prediction with a Single General Self-Rated Health  
49 Question: A Meta-Analysis. *J Gen Int Med* 2006;21(3):267-75.  
50  
51 67. Tillmann R, Voorpostel M, Kuhn U, et al. The Swiss Household Panel Study: Observing social change since  
52 1999. *2016* 2016;7(1):15. doi: 10.14301/llcs.v7i1.360 [published Online First: 2016-01-28]  
53  
54 68. Swiss Federal Office of Public Health. Swiss Health Study 2017 [Available from:  
55 <https://www.bfs.admin.ch/bfs/fr/home/statistiques/sante/enquetes/sgb.html#1002476496> accessed  
56 03.08.2018.  
57  
58  
59  
60



- 1  
2  
3 69. Kroenke K, Spitzer RL, Williams JB, et al. The Patient Health Questionnaire Somatic, Anxiety, and Depressive  
4 Symptom Scales: a systematic review. *Gen Hospit Psychiatry* 2010;32(4):345-59.  
5  
6 70. Spitzer RL, Kroenke K, Williams JB, et al. A brief measure for assessing generalized anxiety disorder: the  
7 GAD-7. *Arch Int Med* 2006;166(10):1092-7.  
8  
9 71. Christina M, E. JS. The measurement of experienced burnout. *J Organ Behav* 1981;2(2):99-113.  
10  
11 72. Mollayeva T, Thurairajah P, Burton K, et al. The Pittsburgh sleep quality index as a screening tool for sleep  
12 dysfunction in clinical and non-clinical samples: A systematic review and meta-analysis. *Sleep Med Rev*  
13 2016;25:52-73.  
14

#### 15 16 Authors contribution

17  
18 YJ conceived the study, is the co-principal investigator, drafted the protocol and wrote the manuscript.

19  
20 CBJ conceived the study, is the co-principal investigator, drafted the protocol and proofread the manuscript.

21  
22 GFL, AD, SC and DC contributed to the study conception and protocol and proofread the manuscript.

23  
24 PB, PC, IG, and HW reviewed the protocol and proofread the manuscript.

25  
26 All authors approved the version to be published and are responsible for its accuracy.

#### 27 Funding

28  
29 The Parchemins study is supported by Geneva University School of Medicine, Foundation Safra, Geneva  
30 Directorate of Health, Geneva Directorate of Social Affairs, Swiss Federal Office of Public Health, the NCCR  
31 LIVES Project and the Swiss National Science Foundation (SNSF) (grant 100017\_182208).  
32  
33

34  
35 Competing interest: none

36  
37 Word count: 3264  
38  
39  
40  
41  
42  
43  
44  
45  
46  
47  
48  
49  
50  
51  
52  
53  
54  
55  
56  
57  
58  
59  
60

**Table 1: variables by domain**

| <b>Personal and family characteristics</b>                                                                                                                                                                                                    | <b>Health</b>                                                                                                                              | <b>Living conditions</b>                                                                                                                    | <b>Employment and economic situation</b>                                                                   |
|-----------------------------------------------------------------------------------------------------------------------------------------------------------------------------------------------------------------------------------------------|--------------------------------------------------------------------------------------------------------------------------------------------|---------------------------------------------------------------------------------------------------------------------------------------------|------------------------------------------------------------------------------------------------------------|
| Sociodemographical characteristics : sex; age; country of birth; nationality                                                                                                                                                                  | Anthropomorphic measures: weight (kg); height (cm)                                                                                         | Housing : number of rooms; number of people sharing accommodation; quality of environment; satisfaction; type of lease contract; rent price | Professional activity : number of employers; sector of employment; number of working hours; working permit |
| Family composition : marital status ; number of children                                                                                                                                                                                      | Somatic health : chronic diseases; accidents; injuries; current treatment                                                                  | Household composition : relation with household members                                                                                     | Working conditions : penibility; exposure to hazards                                                       |
| Children characteristics : gender ; age ; country of birth ; country of residence; current education                                                                                                                                          | Mental health: anxiety ; depression ; current treatment                                                                                    | Discrimination : at the workplace; in public spaces; in healthcare settings                                                                 | Income : individual level; household level; state subsidies                                                |
| Migration history: reason for leaving country of origin; date of departure from country of origin; date of arrival in Switzerland; previous and current residency status in Switzerland; visit to country of origin; regularization procedure | Health behaviors : sleep; physical activity                                                                                                | Social support: satisfaction with social relationships                                                                                      | Financial situation : ability to cover unexpected expense; remittance to country of origin                 |
| Education : number of years at school; highest degree attained; place of education                                                                                                                                                            | Access to care : health insurance; deductibles; cost of premium; State-funded deductions                                                   | Integration into local life : participation to activities; French fluency                                                                   | Satisfaction with financial situation                                                                      |
| Professional qualification : professional training; employment record before migration                                                                                                                                                        | Utilization of the healthcare system: number of ambulatory and emergency room visits; hospitalization; affiliation with a family physician | Satisfaction with life                                                                                                                      |                                                                                                            |
|                                                                                                                                                                                                                                               | Renunciation to healthcare utilization: reasons; type of care                                                                              |                                                                                                                                             |                                                                                                            |
|                                                                                                                                                                                                                                               | Satisfaction with health                                                                                                                   |                                                                                                                                             |                                                                                                            |
|                                                                                                                                                                                                                                               | Occupational health ; emotional exhaustion; professional injuries                                                                          |                                                                                                                                             |                                                                                                            |

# BMJ Open

## Impact of legal status change on undocumented migrants' health and well-being (Parchemins): protocol of a 4-year prospective mixed-methods study.

|                                 |                                                                                                                                                                                                                                                                                                                                                                                                                                                                                                                                                                                                                                                                                                                                                                                                                                                                                                                                                                                                                                                                                                                                                                           |
|---------------------------------|---------------------------------------------------------------------------------------------------------------------------------------------------------------------------------------------------------------------------------------------------------------------------------------------------------------------------------------------------------------------------------------------------------------------------------------------------------------------------------------------------------------------------------------------------------------------------------------------------------------------------------------------------------------------------------------------------------------------------------------------------------------------------------------------------------------------------------------------------------------------------------------------------------------------------------------------------------------------------------------------------------------------------------------------------------------------------------------------------------------------------------------------------------------------------|
| Journal:                        | <i>BMJ Open</i>                                                                                                                                                                                                                                                                                                                                                                                                                                                                                                                                                                                                                                                                                                                                                                                                                                                                                                                                                                                                                                                                                                                                                           |
| Manuscript ID                   | bmjopen-2018-028336.R1                                                                                                                                                                                                                                                                                                                                                                                                                                                                                                                                                                                                                                                                                                                                                                                                                                                                                                                                                                                                                                                                                                                                                    |
| Article Type:                   | Protocol                                                                                                                                                                                                                                                                                                                                                                                                                                                                                                                                                                                                                                                                                                                                                                                                                                                                                                                                                                                                                                                                                                                                                                  |
| Date Submitted by the Author:   | 12-Feb-2019                                                                                                                                                                                                                                                                                                                                                                                                                                                                                                                                                                                                                                                                                                                                                                                                                                                                                                                                                                                                                                                                                                                                                               |
| Complete List of Authors:       | Burton-Jeangros, Claudine; Universite de Geneve, Institut de recherche sociologique; Universite de Geneve, Swiss NCCR LIVES<br>Courvoisier, Delphine; Hopitaux Universitaires de Geneve, Department of general internal medicine, rehabilitation and geriatrics<br>Duvoisin, Aline; Universite de Geneve, Institut de recherche sociologique<br>Ferro-Luzzi, Giovanni; Haute Ecole de Gestion de Geneve; Universite de Geneve, Geneva School of Economic and Management<br>Bodenmann, Patrick; University of Lausanne, Departement of Ambulatory Care and Community Medicine<br>Chauvin, Pierre; Inserm, UMRS 1136, Pierre Louis Institute of Epidemiology and Public Health, Department of Social Epidemiology; Université Pierre et Marie Curie-Paris6 , UMRS 1136<br>Guessous, Idris; Hopitaux Universitaires de Geneve, Service de médecine de premier recours<br>Wolf, Hans; Hopitaux Universitaires de Geneve, Service de médecine pénitentiaire<br>Cullati, Stéphane; Universite de Geneve, Institut de recherche sociologique; Universite de Geneve, Swiss NCCR LIVES<br>Jackson, Yves; Hopitaux Universitaires de Geneve, Service de médecine de premier recours |
| <b>Primary Subject Heading</b>: | Public health                                                                                                                                                                                                                                                                                                                                                                                                                                                                                                                                                                                                                                                                                                                                                                                                                                                                                                                                                                                                                                                                                                                                                             |
| Secondary Subject Heading:      | Health policy                                                                                                                                                                                                                                                                                                                                                                                                                                                                                                                                                                                                                                                                                                                                                                                                                                                                                                                                                                                                                                                                                                                                                             |
| Keywords:                       | undocumented migrant, migration, health, wellbeing, regularization, PUBLIC HEALTH                                                                                                                                                                                                                                                                                                                                                                                                                                                                                                                                                                                                                                                                                                                                                                                                                                                                                                                                                                                                                                                                                         |
|                                 |                                                                                                                                                                                                                                                                                                                                                                                                                                                                                                                                                                                                                                                                                                                                                                                                                                                                                                                                                                                                                                                                                                                                                                           |

SCHOLARONE™  
Manuscripts

1  
2  
3 **Impact of legal status change on undocumented migrants' health and well-being (Parchemins): protocol of a**  
4 **4-year prospective mixed-methods study.**  
5

6  
7 Claudine Burton-Jeangros<sup>1,2</sup>, Delphine S. Courvoisier<sup>3</sup>, Aline Duvoisin<sup>1</sup>, Giovanni Ferro-Luzzi<sup>4,5</sup>, Patrick  
8 Bodenmann<sup>6</sup>, Pierre Chauvin<sup>7</sup>, Idris Guessous<sup>8</sup>, Hans Wolff<sup>8</sup>, Stéphane Cullati<sup>1,2</sup>, Yves Jackson<sup>8</sup>  
9

10  
11 <sup>1</sup> Institute of sociological research, University of Geneva, Switzerland

12 <sup>2</sup> Swiss NCCR 'LIVES—Overcoming Vulnerability: Life Course Perspectives', University of Geneva, Switzerland

13 <sup>3</sup> Department of general internal medicine, rehabilitation and geriatrics, Geneva University Hospitals,  
14 Switzerland

15  
16 <sup>4</sup> Geneva school of business administration, HES-SO, University of Applied Sciences and Arts Western  
17 Switzerland

18  
19 <sup>5</sup> Geneva school of economics and management, University of Geneva, Switzerland

20  
21 <sup>6</sup> Vulnerable population center, Department of ambulatory care and community medicine, Lausanne University  
22 Hospital & University of Lausanne, Switzerland

23  
24 <sup>7</sup> Department of social epidemiology, Sorbonne University, Paris, France

25  
26 <sup>8</sup> Division of primary care medicine, Geneva University Hospitals and University of Geneva, Switzerland

27  
28 <sup>9</sup> Division of prison health, Geneva University Hospitals and University of Geneva, Switzerland

29  
30 **Contact**

31 Yves Jackson

32  
33 Division of primary care medicine Geneva University Hospitals

34 Rue Gabrielle Perret-Gentils 6, 1211 Geneva, Switzerland

35  
36 Phone: +41 22 372 96 56

37  
38 Yves.jackson@hcuge.ch

39  
40 **Abstract**

41 **Introduction**

42  
43  
44 Migrants without residency permit, known as undocumented, tend to live in precarious conditions and to be  
45 exposed to an accumulation of adverse determinants of health. Only scarce evidence exists on the social,  
46 economic and living conditions-related factors influencing their health status and wellbeing. No study has  
47 assessed the impact of legal status regularization. The Parchemins study is the first prospective mixed-methods  
48 study aiming at measuring the impact on health and well-being of a regularization policy on undocumented  
49 migrants in Europe.  
50  
51  
52

53  
54 **Methods and analysis**

55  
56 The Parchemins study will compare self-rated health and satisfaction with life in a group of adult  
57 undocumented migrants who qualify for applying for a residency permit (intervention group) with a group of  
58 undocumented migrants who are lack one or more eligibility criteria for regularization (control group) in  
59  
60

1  
2  
3 Geneva Canton, Switzerland. Asylum seekers are not included in this study. The total sample will include 400  
4 participants. Data collection will consist of standardized questionnaires complemented by semi-directed  
5 interviews in a sub-sample (n=38) of migrants qualifying for regularization. The baseline data will be collected  
6 just before or during the regularization and participants will subsequently be followed-up yearly for three  
7 years. The quantitative part will explore variables about health (i.e. health status, occupational health, health  
8 seeking behaviors, access to care, healthcare utilization), wellbeing (measured by satisfaction with different  
9 dimensions of life), living conditions (i.e. employment, accommodation, social support) and economic situation  
10 (income, expenditures). Several confounders including sociodemographic characteristics and migration history  
11 will be collected. The qualitative part will explore longitudinally the experience of change in legal status at  
12 individual and family levels.  
13  
14  
15  
16  
17

#### 18 Ethics and dissemination

19  
20  
21 This study was approved by the Ethics Committee of Geneva, Switzerland. All participants provide informed  
22 consent. Results will be shared with undocumented migrants and disseminated in scientific journals and  
23 conferences. Fully anonymized data will be available to researchers.  
24  
25

#### 26 Strengths and limitations of this study

- 27  
28  
29 - The prospective and mixed-methods approaches will allow generating a comprehensive understanding of  
30 factors operating across time on health and wellbeing.  
31  
32 - The qualitative part will provide further insights into individual and family experiences in parting with their  
33 undocumented status and facing the new challenges that regularization entails.  
34  
35 - The main limitation will be the risk of attrition in the control group considering the harsh and unpredictable  
36 living context of such migrants.  
37  
38 - The study is designed to minimize such risk by selecting undocumented migrants having a relatively stable  
39 personal situation.  
40  
41  
42  
43  
44

45 Keywords: undocumented migrants, irregular migration, health, wellbeing, regularization

#### 46 Introduction

47  
48  
49 Undocumented or irregular migration is defined as “*movements that takes place outside the regulatory norms*  
50 *of the sending, transit and receiving countries*”.<sup>1</sup> It results from overstaying after temporary residency permit  
51 expiration, asylum claim refusal or entering the country without valid migration documentation.<sup>1,2</sup> In absence  
52 of valid methods of identification, figures provided for undocumented migrants are mainly theoretical and  
53 estimated by cross-referencing different sources. Recent valid data is generally lacking. The International  
54 Organization for Migration estimated that there were 20-30 million undocumented migrants worldwide in  
55 2010.<sup>3</sup> According to the Pew Hispanic Center, the number of undocumented migrants from Latin America in the  
56 United States increased from 8.4 in 2000 to 11.1 million in 2011.<sup>4</sup> Europe hosted an estimated 1.9 to 3.8 million  
57  
58  
59  
60

1  
2  
3 of such migrants in 2008 and the most recent estimates point to 180'000-520'000 and 58'000-105'000 of them  
4 in Germany and Switzerland, respectively.<sup>5-7</sup>  
5

### 6 *A vulnerable population*

7  
8  
9 The lack of legal residency permit interacts with social, political and economic factors to create multi-  
10 dimensional vulnerability among undocumented migrants.<sup>8,9</sup> In most European countries, they face significant  
11 post-migration difficulties in the context of restrictive immigration policies and lack of labor protection <sup>2,10</sup>.  
12 Many are employed in low-skills and precarious 3D (dangerous, dirty and degrading) jobs and are exposed to  
13 abuse, exploitation and occupational hazards.<sup>11-14</sup> Access to other basic commodities and services such as  
14 housing, education and training, food and legal protection in case of harm or abuse is usually arduous and  
15 precarious.<sup>10,15</sup>  
16  
17  
18  
19

20  
21 When compared to the resident and the regular migrants' populations, self-rated physical and mental health is  
22 consistently and significantly poorer among undocumented migrants in Europe.<sup>16,17</sup> In a study conducted in 11  
23 countries, 23% of women and 34% of men, including those in the youngest age groups, rated their health as  
24 poor or very poor.<sup>12</sup> Undocumented migrants present high prevalence of chronic conditions in primary care  
25 settings, notably of metabolic, cardiovascular and psychiatric origins.<sup>16,18-22</sup> Several infectious diseases are more  
26 prevalent than in the resident population which relates more to geographic origins than to the legal status.<sup>23,24</sup>  
27 No comparative data exist on the mortality rate ratio of undocumented migrants compared to the general  
28 population but external (including accidents and suicides) and circulatory causes of death were 3.6 and 2.2  
29 times more prevalent in a sample of such migrants than in the general Swedish population, respectively.<sup>25</sup>  
30  
31  
32  
33  
34

35 Undocumented migrants in Europe face limited opportunities to respond to their healthcare needs with  
36 barriers to healthcare operating at different levels.<sup>12,26-28</sup> Legal entitlement to receive medical care within the  
37 public healthcare system varies considerably between countries. A majority of countries restrict access to  
38 emergency situations exclusively.<sup>29,30</sup> Non-governmental organizations (NGOs) play a subsidiary role but  
39 services provided are generally of limited extent and do not cover the full range of health needs.<sup>12</sup> Access to  
40 costly treatments in the absence of formal entitlement to healthcare is frequently restricted, which entails  
41 significant health consequences, notably in the context of severe chronic diseases such as HIV/AIDS infection.<sup>31</sup>  
42  
43  
44  
45  
46  
47  
48  
49  
50  
51  
52  
53  
54  
55  
56  
57  
58  
59  
60

61  
62  
63  
64  
65  
66  
67  
68  
69  
70  
71  
72  
73  
74  
75  
76  
77  
78  
79  
80  
81  
82  
83  
84  
85  
86  
87  
88  
89  
90  
91  
92  
93  
94  
95  
96  
97  
98  
99  
100

1  
2  
3 health insurance (which grants access to standard healthcare) but lack of awareness, financial and  
4 administrative barriers as well as fear of denunciation contribute to the estimated 10-20% insurance coverage.  
5  
6 <sup>42,43</sup> Swiss cantons have implemented different policies to bridge this access gap. Geneva and Vaud provide  
7 health services within the public healthcare system which are complemented by other services (food, shelter)  
8 provided by NGOs.<sup>42</sup> Yet, previous studies showed that undocumented migrants in Geneva tend to delay  
9 seeking care, notably for preventive interventions.<sup>38</sup>  
10  
11

### 12 13 *Regularization policies*

14 Several regularization programs have been implemented in Europe and an estimated 1.8 million  
15 undocumented migrants were granted a residency permit between 2002 and 2008.<sup>2</sup> Switzerland has never  
16 implemented large-scale programs but a handful of individual applications (mainly through NGOs or lawyers'  
17 services) have been successful to varying degrees depending on the canton. Residency permits have been  
18 granted mainly for humanitarian motives, in case of severe medical needs, long stay and satisfactory  
19 integration, absence of criminal record and financial autonomy.<sup>5</sup> In 2017, the Geneva Canton implemented a  
20 two-year pilot regularization program (Operation Papyrus) aiming at granting one-year residency permits to  
21 undocumented migrants meeting the following criteria: a) stay of 10 years for individuals or 5 years for families  
22 with school-aged children; b) basic French proficiency; c) sufficient financial resources; d) lack of criminal  
23 record other than related to the residency permit.<sup>44</sup> The program integrates civil society actors (workers'  
24 unions, NGOs) that act as gatekeepers between undocumented migrants and the Canton authorities, and  
25 support them with the administrative process leading to regularization.  
26  
27  
28  
29  
30  
31  
32

33 The impact of regularization policy on undocumented migrants' health, well-being, living conditions and  
34 economic situation has rarely been studied in Europe. Scarce evidence shows improved access to legal  
35 employment, social welfare and insurances with better housing and educational opportunities.<sup>45</sup> Negative  
36 effects included enhanced professional competition associated with the lack of recognition of pre-migration  
37 professional qualifications. In Italy, the 2007 amnesty policy was associated with a 1.2 to 2.7% point decline in  
38 low birth weight prevalence within the migrant population eligible for regularization.<sup>46</sup> In the USA, the Deferred  
39 Action for Children Arrival act (DACA) implemented in 2012 allowed around 800'000 undocumented young  
40 people to be temporarily regularized. Studies found a decline in psychological distress, improvements in self-  
41 esteem, wellbeing, and social support and pointed to beneficial trans-generational effects on children mental  
42 health.<sup>47-49</sup> No study has prospectively explored the impact of legal status change on health and wellbeing while  
43 taking into accounts undocumented migrants living and working conditions.  
44  
45  
46  
47  
48  
49  
50

### 51 *Gaps in the existing literature*

52 While the development of knowledge about asylum seekers and refugees' health is accelerating, research on  
53 undocumented migrants' health lags behind.<sup>28,50</sup> The number and quality of studies being limited, there are  
54 some major gaps in the current knowledge about their health and wellbeing and their relationship to living and  
55 economic conditions.  
56  
57  
58  
59  
60

1  
2  
3 Most studies have been conducted in healthcare settings, thus entailing a systematic selection bias restricting  
4 their generalizability, and are cross-sectional or retrospective, which hampers the ability to measure changes  
5 over time and to identify causal relationships.<sup>12 16 17 26 35 38 51-55</sup> Most studies are monodisciplinary, rely on a  
6 single methodology, typically measure a limited range of health indicators and usually overlook the wellbeing  
7 dimension. These limitations restrict the ability to foster a comprehensive understanding of the complexity and  
8 the dynamics of health and wellbeing evolution after regularization in a longitudinal perspective taking into  
9 account the interactions between medical, social, legal and economic factors.

10  
11  
12  
13  
14 A second gap pertains to the lack of in-depth understanding of the impact of legal status change  
15 (regularization) on the health and living conditions of individual migrants but also of the rest of their family.<sup>13 16</sup>  
16  
17  
18  
19  
20  
21  
22  
23  
24  
25  
26  
27  
28  
29  
30  
31  
32  
33  
34  
35  
36  
37  
38  
39  
40  
41  
42  
43  
44  
45  
46  
47  
48  
49  
50  
51  
52  
53  
54  
55  
56  
57  
58  
59  
60

26 35 36 38 43 In particular, there is a lack of evidence about how undocumented migrants interpret the  
transformation of their living conditions during and after regularization and the ambivalent individual and  
family consequences of migration and regularization clearly need to be better understood.<sup>56</sup> This again calls for  
the collection of longitudinal data.<sup>56 57</sup> The underdevelopment of research on transnational undocumented  
migrant families mirrors the limited interest from policymakers.<sup>56</sup>

### *Theoretical perspectives*

To address the limitations of the available research, our research design is supported by two main theoretical  
perspectives allowing assessing the role of regularization.

- (1) The perspective of wellbeing and quality of life (QoL) is typically articulated with the social determinants of  
health framework promoted among others by the World Health Organization (WHO). Indeed the model  
developed by the WHO maps the multiple factors that affect equity in both health and wellbeing.<sup>58</sup>  
Growing interest for wellbeing is evidenced by the Organization for Economic Co-operation and  
Development (OCDE) framework that associates objective indicators of material conditions with QoL  
indicators in different domains (including housing, education, income, etc.).<sup>59 60</sup> This framework is  
particularly relevant to assess the situation of newly regularized migrants, along the idea that QoL reflects  
the gap between individuals' actual situation and that to which they aspire.<sup>61</sup> We can hypothesize that  
undocumented migrants' wellbeing might be higher than that of Swiss residents with similar levels of  
resources..
- (2) The dynamic approach of the life course will allow examining undocumented migrants' trajectories both  
retrospectively and prospectively. Considering how much stress and uncertainty the absence of legal  
documents generates, regularization represents a major transition. At the same time, the acquisition of a  
legal status can bring mixed consequences, including both positive (elimination of the deportation risk,  
better housing) and negative (new financial constraints like taxes, competition on the labor market)  
influences. The life course perspective will be used to assess how regularization modifies the balance  
between vulnerability, resources and reserves.<sup>62 63</sup>

### *Objectives of the study and research questions*



1  
2  
3 This study aims to measure how regularization impacts the health and wellbeing of undocumented migrants in  
4 Geneva Canton. To reach this goal, five research questions have been formulated:  
5  
6

- 7 1. What are the living conditions of undocumented migrants living in Geneva?
- 8 2. What are the health status, including the mental and somatic dimensions, and well-being of  
9 undocumented migrants living in Geneva?
- 10 3. What are the health-seeking behaviors, healthcare utilization, including emergency services, and  
11 renouncement to medical care, among undocumented migrants living in Geneva?
- 12 4. What is the impact of regularization on their health and well-being and its relationship with changes in  
13 living conditions?
- 14 5. How do contextual factors shape the experience of transitioning towards legality for undocumented  
15 individuals and families?  
16  
17  
18  
19  
20

## 21 Methods and data analysis

### 22 Design

23  
24  
25  
26 This prospective mixed-methods observational study compares a group of undocumented migrants undergoing  
27 regularization with a group of migrants not eligible for regularization. A nested qualitative longitudinal study  
28 focuses on a sub-sample of individuals undergoing regularization. The data collection started in 2017 and will  
29 end in 2021.  
30  
31

32  
33 The research plan is organized to respond to the set of research questions developed on the following  
34 hypotheses: i) undocumented migrants endure deleterious living and economic conditions compared to the  
35 general population which has an impact on their health and wellbeing; ii) regularization of the legal status  
36 impacts on health and wellbeing; iii) differences in health and wellbeing after regularization are mediated by  
37 changes in living and economic conditions and iv) regularization may cause vulnerability in health and living  
38 conditions.  
39  
40  
41

### 42 Setting

43  
44  
45 This study takes place in Geneva Canton located in French-speaking Western Switzerland. The resident  
46 population is 500'000 including 10-15'000 undocumented migrants.  
47  
48

### 49 Eligibility criteria

### 50 Inclusion criteria

51  
52  
53 Migrants aged  $\geq 18$  years, originating from countries outside the European Union or European Free Trade  
54 Association, living in Geneva without a valid residency permit (undocumented) for at least 3 years, who plan to  
55 stay in Geneva at least 3 more years, have not registered as asylum seekers, are eligible to participate. They are  
56 categorized into two groups: (1) those undergoing the regularization process or who have been regularized for  
57  
58  
59  
60

1  
2  
3 less than three months (intervention group) and (2) those who do not meet the regularization eligibility criteria  
4 or are unwilling to apply for regularization (control group).  
5

#### 6 Exclusion criteria

7  
8  
9 The inability to hold a basic conversation in one of the languages spoken by investigators (French, Spanish,  
10 Portuguese, English, Albanian, and Italian) is the only exclusion criteria.  
11

#### 12 Intervention

13  
14  
15 Participants eligible for legal status regularization (intervention group) will receive a residency permit within 3-  
16 6 months after the submission of their application to the Canton authorities. This process will take place during  
17 the first year of data collection. The information about permit acceptance will be collected through participants  
18 and the NGOs. This permit is renewable annually. Outcomes  
19  
20  
21

#### 22 Primary outcome measure

23  
24  
25 The primary outcome is self-rated health. It will be measured by comparing intra-group differences at baseline  
26 and after 3 years. Yearly measurements will allow for observing fluctuations in such differences. This item will  
27 be measured using the SF-12 question 1, a 5-points Likert scale<sup>64</sup>, whose large-scale use also allows for  
28 comparing the results with other groups of population. We selected the main outcome for its prognostic value  
29 in terms of morbidity and mortality.<sup>65 66</sup>  
30  
31  
32

#### 33 Secondary outcome measure

34  
35  
36 The secondary outcome consists of self-reported satisfaction with current life as measured through the  
37 dimensions of living condition and economic situation at baseline and after three years. Each domain will be  
38 measured every year with a single question using a 10-points Likert scale ranging from 0=absolutely not  
39 satisfied to 10=absolutely satisfied. This will allow to measure key dimensions of the OCDE wellbeing  
40 framework and provide comparison with the resident population.<sup>60</sup>  
41  
42  
43

#### 44 Additional variables under investigations

45  
46  
47 The quantitative part explores four domains, i.e. (1) personal and family characteristics, (2) health, (3) living  
48 conditions and (4) employment and economic situation. Table 1 presents the variables under study, to the  
49 exception of the main outcomes. These variables will be used as predictors for the main outcomes. The  
50 questionnaire was designed to provide data that allow for comparisons with the general population living in  
51 Switzerland, by using questions from population surveys such as the Household Panel Study or the Swiss Health  
52 Survey.<sup>67 68</sup> For specific domains, we use validated measurement tools selected for their validity and reliability  
53 in non-clinical settings. We apply the PHQ-9 and GAD-7 scales for the screening of depression and anxiety,  
54 respectively.<sup>69 70</sup> Occupational mental health is assessed with the Maslach Burnout Inventory Test, specifically  
55 the emotional exhaustion dimension.<sup>71</sup> We use The Pittsburg Sleep Quality Index Sleep Quality to evaluate  
56  
57  
58  
59  
60

1  
2  
3 sleep.<sup>72</sup> The questionnaire was pretested with a sample of participants (n=5), allowing for iterative  
4 modifications.  
5

6  
7 Table 1: variables by domain  
8  
9  
10  
11  
12  
13  
14  
15  
16  
17  
18  
19  
20  
21  
22  
23  
24  
25  
26  
27  
28  
29  
30  
31  
32  
33  
34  
35  
36  
37  
38  
39  
40  
41  
42  
43  
44  
45  
46  
47  
48  
49  
50  
51  
52  
53  
54  
55  
56  
57  
58  
59  
60

For peer review only

| Personal and family characteristics                                                                                                                                                                                                           | Health                                                                                                                                            | Living conditions                                                                                                                      | Employment and economic situation                                                                                  |
|-----------------------------------------------------------------------------------------------------------------------------------------------------------------------------------------------------------------------------------------------|---------------------------------------------------------------------------------------------------------------------------------------------------|----------------------------------------------------------------------------------------------------------------------------------------|--------------------------------------------------------------------------------------------------------------------|
| Sociodemographical characteristics*** : sex; age; country of birth; nationality                                                                                                                                                               | Anthropomorphic measures: weight (kg)***; height (cm)***                                                                                          | Housing : number of rooms*; number of people sharing accommodation***; quality of environment*; type of lease contract***; rent price* | Professional activity : number of employers*; sector of employment***; number of working hours***; working permit* |
| Family composition*** : marital status ; number of children                                                                                                                                                                                   | Somatic health : chronic diseases**/**; accidents***; injuries; current treatment**                                                               | Household composition : relation with household members***                                                                             | Working conditions : penibility**; exposure to hazards **                                                          |
| Children characteristics : gender ; age ; country of birth ; country of residence; current education                                                                                                                                          | Mental health: anxiety ; depression** <sup>69 70</sup> ; current treatment                                                                        | Discrimination** : at the workplace; in public spaces; in healthcare settings                                                          | Income : individual level***; household level***; state subsidies*                                                 |
| Migration history: reason for leaving country of origin; date of departure from country of origin; date of arrival in Switzerland; previous and current residency status in Switzerland; visit to country of origin; regularization procedure | Health behaviors : sleep <sup>72</sup> ; physical activity***                                                                                     | Social support: satisfaction with social relationships**                                                                               | Financial situation : ability to cover unexpected expense; remittance to country of origin                         |
| Education : number of years at school; highest degree attained***; place of education                                                                                                                                                         | Access to care : health insurance; deductibles***; cost of premium; State-funded deductions*                                                      | Integration into local life : participation to activities**; French fluency                                                            |                                                                                                                    |
| Professional qualification : professional training; employment record before migration                                                                                                                                                        | Utilization of the healthcare system: number of ambulatory and emergency room visits**; hospitalization***; affiliation with a family physician** |                                                                                                                                        |                                                                                                                    |
|                                                                                                                                                                                                                                               | Renunciation to healthcare utilization: reasons; type of care                                                                                     |                                                                                                                                        |                                                                                                                    |
|                                                                                                                                                                                                                                               | Occupational health** ; emotional exhaustion <sup>71</sup> ; professional injuries**                                                              |                                                                                                                                        |                                                                                                                    |

\* Variables of the Swiss Household Panel; \*\* variables of the Swiss Health Survey

#### Qualitative part

The following themes will be covered during the semi-directed interviews: marital and family dynamics, including relationships with family members not living in Switzerland; experience of the regularization process

1  
2  
3 and its positive and negative implications; perspectives and aspirations for the future; for parents: educational  
4 issues and aspirations for their children's future. The interview guide has been pretested with 5 persons.  
5  
6

#### 7 Participant timeline

8  
9 Quantitative data will be collected by questionnaire at baseline and repeated annually during the following  
10 three year (4 waves in total) (Figure 1). Questionnaires will be filled face-to-face with participants in the  
11 intervention and the control groups. We restricted the follow-up to three years assuming that most changes in  
12 the domains under study will occur during the first two years, followed by a more stable situation. This  
13 restriction also aims to reduce the attrition rate. Qualitative interviews are conducted at baseline (year 1) and  
14 then every year for three years. They are conducted at a different time from the quantitative data collection to  
15 avoid participants' fatigue.  
16  
17  
18  
19

#### 20 Sample size

21  
22 Considering an effect size of 0.3 for the main health outcome (self-rated health), a type 1 error of 0.05 and a  
23 power of 0.8, the total sample size is 352, rounded up to 400 to account for the possible drop-out of  
24 participants over the follow-up.  
25  
26  
27

28 The purposive qualitative nested study sampling includes 38 participants selected from the intervention group  
29 of undocumented migrants eligible for regularization. The sample size is estimated to be sufficient to reach  
30 data saturation. To ensure the diversity of the sample, participants are recruited on the respectively absence or  
31 presence of children, while ensuring the diversity of the sample regarding origins, age and gender.  
32  
33  
34

#### 35 Recruitment

36  
37 According to the Geneva authorities, 1'000-2'000 undocumented migrants could be eligible for the  
38 regularization policy Recruitment is based on two strategies. First, undocumented migrants are informed about  
39 the study by personal contacts at NGOs acting at gatekeepers for "Operation Papyrus", during public meetings  
40 held in the community, at dedicated health centers attending for undocumented migrants, through leaflets and  
41 a Facebook page. A direct phone line is accessible during office hours to respond to all enquiries. People  
42 interested in participating contact the investigators who present the study information and consent forms and  
43 engage in the first questionnaire passing if agreement is provided.  
44  
45  
46  
47  
48

49 The second strategy is based on phone contacts with potential participants identified in partner NGOs registries  
50 of undocumented migrants. During the initial call, investigators present the study and offer to organize a first  
51 meeting to provide more in-depth information. In the absence of response, potential participants are recalled  
52 up to five times.  
53  
54

#### 55 Retention

56  
57 Undocumented migrants are highly mobile and can be lost during the follow-up. In order to account for this  
58 risk, the sample size has been increased by 12.5%. All participants undergoing the first round of data collection  
59  
60

1  
2  
3 will be contacted yearly for the subsequent waves. In order to enhance retention into the study, the following  
4 strategies are implemented: a) providing a material compensation (worth 10-15 euros) and information about  
5 available health and administrative services after each questionnaire passation; b) discussing the need for and  
6 gaining acceptance for the next contact after one year upon each encounter; c) recording a secondary phone  
7 number or email address to ensure participants are accessible. Moreover, partner NGOs inform communities of  
8 the importance of the follow-up. Contact for the following data collection will be made by phone with up to  
9 five recalls and use of email messaging in case of non-response. In order to facilitate participation and  
10 retention into the study, the field investigators can move to the preferred participant's location to pass the  
11 questionnaire.

12  
13  
14  
15  
16  
17  
18 Participants may withdraw from the study for any reason at any time. In case of withdrawal or loss to follow-  
19 up, all data will be included until the last participants' questionnaire for the analysis.

#### 20 21 22 Quantitative data collection

23  
24 The questionnaire is administered face-to-face with participants of both groups at their preferred location in  
25 the community. It is available in the four most frequent languages (Spanish, Portuguese, French, English)  
26 spoken by undocumented migrants in Geneva. Data are recorded on a mobile tablet using Sphinx mobile®  
27 software (LeSphinx, France) and are immediately transferred on a secure server. Interviewers are trained and  
28 supervised by a senior staff during their first interviews.

#### 29 30 31 32 Qualitative data collection

33  
34 In the qualitative section, data are collected in semi-directed interviews with undocumented migrants in the  
35 process of regularization. They are conducted in French, Spanish and English. Interviews are tape recorded and  
36 fully transcribed.

#### 37 38 39 40 Statistical analysis

41  
42 In a first step, the two groups (intervention vs. control) will be compared on all characteristics, using univariate  
43 analysis such as Fisher exact test for categorical variables and Wilcox rank sum test for continuous variables.  
44 This will allow determining the quality of the control group selection.

45  
46  
47 To assess the evolution of health outcomes and living conditions over time, we will use multilevel linear models  
48 (logistic, Poisson, or Gaussian as appropriate depending on the specific outcome), including legal status  
49 (regularized vs. control) and adjusting for baseline characteristics to further account for group differences.  
50 Multilevel models account for the repeated nature of the data. To specifically focus on the different  
51 trajectories, these models will include both a random intercept and a random slope over time. Note that for  
52 rare dichotomous outcomes, we will probably need to restrict the number of covariates due to a number of  
53 events per variables below five per predictor. In that case, we will use two strategies. First, we will apply  
54 propensity score adjustment, using all previously described covariates to compute the propensity score.  
55 Second, because the propensity score may not capture the importance of some confounders and lead to  
56  
57  
58  
59  
60

1  
2  
3 residual confounding, we will use a least absolute shrinkage and selection operator (LASSO) regression to  
4 determine which covariates are the most useful, before using only those covariates for adjustment.  
5

#### 6 7 Qualitative data analysis

8  
9 Thematic analyses of the transcriptions will be conducted with Atlas.ti ([www.atlasti.com](http://www.atlasti.com)), combining a set of  
10 codes defined along the interview guide and new codes inductively generated over the course of the analysis.  
11

#### 12 13 Ethics and dissemination

14  
15 This study was approved by the Ethics Committee of Geneva Canton, Switzerland (CCER 2017-00897). All  
16 participants will provide informed consent. Results will be shared with migrant communities and NGOs  
17 supporting undocumented migrants and disseminated in scientific journals and in conferences. Fully  
18 anonymized data will be made available to researchers.  
19  
20

#### 21 22 Patient and Public Involvement

23  
24 The development of the research questions, outcome measures and investigation strategies were informed by  
25 discussions conducted with community organizations active with undocumented migrants and with  
26 undocumented migrant patients seen by the main investigator (YJ). Patients were not directly involved in the  
27 design of the study but feedbacks from participants after the questionnaire pre-testing were used to adapt its  
28 content. One of the field investigators is a former undocumented migrant. The results will be disseminated to  
29 study participants by two channels: a) regular public meetings, the first of which took place on November 6<sup>th</sup>  
30 2018 and through partner community organizations.  
31  
32  
33

#### 34 35 Discussion

36  
37  
38 This mixed methods study aims to measure the impact of legal status change on health and wellbeing of  
39 undocumented migrants taking in account living, employment and economic conditions. It will produce the first  
40 comprehensive and longitudinal evaluation of a policy response to irregular migration in Europe. The  
41 interdisciplinary approach warrants the generation of rich data about a complex phenomenon. Considering the  
42 contemporary political and scientific interest in issues pertaining to migration worldwide, this study is at the  
43 forefront to provide original, interdisciplinary and comprehensive evidence about an ill-researched population.  
44 The results will influence how such issues are framed and discussed at local, national and international levels.  
45 Data will specifically inform about unmet health needs, expectations and resources of undocumented migrants,  
46 therefore allowing for guiding clinical and public health strategies in Switzerland and similar countries. This may  
47 allow for an opportunity to mitigate inequalities in health outcomes and in access to health services. Most  
48 importantly, this study will provide a safe environment to give a voice to a silent and underserved population.  
49  
50  
51  
52  
53  
54

#### 55 56 References

57  
58 1. International Organization for Migration. World migration report 2018. Geneva: IOM, 2017.  
59  
60

- 1  
2  
3 2. Kraler A, Rogoz M. Irregular migration in the European Union since the turn of the millennium –  
4 development, economic background and discussion. Database on Irregular Migration, Working paper  
5 11/2011. Vienna: International Centre for Migration Policy Development (ICMPD), 2011.  
6  
7
- 8 3. International Organization for Migration. World Migration Report 2010. Geneva: IOM, 2010.
- 9 4. Pew Hispanic Centre. A Nation of Immigrants. A Portrait of the 40 Million, Including 11 Million Unauthorized.  
10 Washington: Pew Research Centre, 2013.  
11
- 12 5. Morlok M, Oswald A, Meier H, et al. Les sans-papiers en Suisse en 2015. Bâle: BSS, 2016.
- 13 6. Vogel D, Kovacheva V, Prescott H. The size of the irregular migrant population in the European Union -  
14 counting the uncountable? *Int Migr* 2011;49(5):78-96. [published Online First: 2011/12/15]  
15
- 16 7. Vogel D. Update report Germany: Estimated number of irregular foreign residents in Germany (2014).  
17 Database on Irregular Migration. Bremen: University of Bremen, 2015.  
18
- 19 8. Willen SS. Migration, "illegality," and health: mapping embodied vulnerability and debating health-related  
20 deservingness. *Soc Sci Med* 2012;74(6):805-11. doi: 10.1016/j.socscimed.2011.10.041 [published  
21 Online First: 2012/01/20]  
22
- 23 9. Fleischman Y, Willen SS, Davidovitch N, et al. Migration as a social determinant of health for irregular  
24 migrants: Israel as case study. *Soc Sci Med* 2015;147:89-97. doi: 10.1016/j.socscimed.2015.10.046  
25 [published Online First: 2015/11/10]  
26
- 27 10. Chauvin P, Simonnot N, Douay C, et al. Access to healthcare for people facing multiple vulnerability factors  
28 in 27 cities across 10 countries. Report on the social and medical data gathered in 2013 in eight  
29 European countries, Turkey and Canada. Paris: International network of Médecins du monde, 2014.  
30
- 31 11. Benach J, Muntaner C, Delclos C, et al. Migration and "low-skilled" workers in destination countries. *PLoS*  
32 *Med* 2011;8(6):e1001043. [published Online First: 2011/06/15]  
33
- 34 12. Chauvin P, Parizot I, Simonnot N. Access to healthcare for undocumented migrants in 11 European  
35 countries. In: healthcare. Eooat, ed. Paris: Médecins du Monde, 2009.  
36
- 37 13. Sousa E, Agudelo-Suarez A, Benavides FG, et al. Immigration, work and health in Spain: the influence of  
38 legal status and employment contract on reported health indicators. *International journal of public*  
39 *health* 2010;55(5):443-51. doi: 10.1007/s00038-010-0141-8 [published Online First: 2010/04/20]  
40
- 41 14. Ahonen EQ, Porthe V, Vazquez ML, et al. A qualitative study about immigrant workers' perceptions of their  
42 working conditions in Spain. *J Epidemiol Community Health* 2009;63(11):936-42. doi:  
43 10.1136/jech.2008.077016 [published Online First: 2009/06/02]  
44
- 45 15. Aragona M, Pucci D, Mazzeti M, et al. Post-migration living difficulties as a significant risk factor for PTSD in  
46 immigrants: a primary care study. *Italian Journal of Public Health* 2012;9(3):e7525-1.  
47
- 48 16. Kuehne A, Huschke S, Bullinger M. Subjective health of undocumented migrants in Germany - a mixed  
49 methods approach. *BMC public health* 2015;15:926. doi: 10.1186/s12889-015-2268-2 [published  
50 Online First: 2015/09/21]  
51
- 52 17. D'Egidio V, Mipatrini D, Massetti AP, et al. How are the undocumented migrants in Rome? Assessment of  
53 quality of life and its determinants among migrant population. *J Public Health (Oxf)* 2017;39(3):440-46.  
54 doi: 10.1093/pubmed/fdw056 [published Online First: 2016/07/17]  
55  
56  
57  
58  
59  
60



18. Jackson Y, Paignon A, Wolff H, et al. Health of undocumented migrants in primary care in a Swiss university hospital: the importance of chronic diseases. *PLoS one* 2018
19. Jackson Y, Castillo S, Hammond P, et al. Metabolic, mental health, behavioural and socioeconomic characteristics of migrants with Chagas disease in a non-endemic country. *Tropical medicine & international health : TM & IH* 2012;17(5):595-603. doi: 10.1111/j.1365-3156.2012.02965.x
20. Lindert J, Ehrenstein OS, Priebe S, et al. Depression and anxiety in labor migrants and refugees--a systematic review and meta-analysis. *Soc Sci Med* 2009;69(2):246-57. doi: 10.1016/j.socscimed.2009.04.032 [published Online First: 2009/06/23]
21. Myhrvold T, Smastuen MC. The mental healthcare needs of undocumented migrants: an exploratory analysis of psychological distress and living conditions among undocumented migrants in Norway. *Journal of clinical nursing* 2017;26(5-6):825-39. doi: 10.1111/jocn.13670
22. van de Sande JSO, van den Muijsenbergh M. Undocumented and documented migrants with chronic diseases in Family Practice in the Netherlands. *Family practice* 2017;34(6):649-55. doi: 10.1093/fampra/cmz032 [published Online First: 2017/04/27]
23. Wolff H, Janssens JP, Bodenmann P, et al. Undocumented migrants in Switzerland: geographical origin versus legal status as risk factor for tuberculosis. *Journal of immigrant and minority health / Center for Minority Public Health* 2010;12(1):18-23. doi: 10.1007/s10903-009-9271-6
24. Jackson Y, Getaz L, Wolff H, et al. Prevalence, clinical staging and risk for blood-borne transmission of Chagas disease among Latin American migrants in Geneva, Switzerland. *PLoS neglected tropical diseases* 2010;4(2):e592. doi: 10.1371/journal.pntd.0000592
25. Wahlberg A, Kallestål C, Lundgren A, et al. Causes of death among undocumented migrants in Sweden, 1997-2010. *Global health action* 2014;7:24464. doi: 10.3402/gha.v7.24464 [published Online First: 2014/06/10]
26. Woodward A, Howard N, Wolffers I. Health and access to care for undocumented migrants living in the European Union: a scoping review. *Health policy and planning* 2014;29(7):818-30. doi: 10.1093/heapol/czt061
27. Süss A, Ruiz Perez I, Ruiz Azarola A, et al. The right of access to health care for undocumented migrants: a revision of comparative analysis in the European context. *European journal of public health* 2014;24(5):712-20. doi: 10.1093/eurpub/cku036
28. De Vito E, De Waure C, Specchia M, et al. Public health aspects of migrant health: a review of the evidence on health status for undocumented migrants in the European Region. Copenhagen: World Health Organisation (WHO) Regional Office for Europe,, 2016.
29. Cuadra CB. Right of access to health care for undocumented migrants in EU: a comparative study of national policies. *European journal of public health* 2012;22(2):267-71. doi: 10.1093/eurpub/ckr049
30. Karl-Trummer U, Novak-Zezula S, Metzler B. Access to health care for undocumented migrants in the EU: A first landscape of NowHereland. *EuroHealth* 2010;16(1):13-16.
31. Perez-Molina JA, Pulido Ortega F. [Assessment of the impact of the new health legislation on illegal immigrants in Spain: the case of human immunodeficiency virus infection]. *Enfermedades infecciosas y*

- 1  
2  
3 *microbiologia clinica* 2012;30(8):472-8. doi: 10.1016/j.eimc.2012.07.004 [published Online First:  
4 2012/09/04]  
5
- 6 32. Deblonde J, Sasse A, Del Amo J, et al. Restricted access to antiretroviral treatment for undocumented  
7 migrants: a bottle neck to control the HIV epidemic in the EU/EEA. *BMC public health* 2015;15:1228.  
8 doi: 10.1186/s12889-015-2571-y [published Online First: 2015/12/15]  
9
- 10 33. Dauvrin M, Lorant V, Sandhu S, et al. Health care for irregular migrants: pragmatism across Europe: a  
11 qualitative study. *BMC research notes* 2012;5:99. doi: 10.1186/1756-0500-5-99  
12
- 13 34. Hudelson P, Perron NJ, Perneger TV. Measuring physicians' and medical students' attitudes toward caring  
14 for immigrant patients. *Evaluation & the health professions* 2010;33(4):452-72. doi:  
15 10.1177/0163278710370157 [published Online First: 2010/05/21]  
16
- 17 35. Schoevers MA, Loeffen MJ, van den Muijsenbergh ME, et al. Health care utilisation and problems in  
18 accessing health care of female undocumented immigrants in the Netherlands. *International journal of*  
19 *public health* 2010;55(5):421-8. doi: 10.1007/s00038-010-0151-6 [published Online First: 2010/05/27]  
20
- 21 36. Poduval S, Howard N, Jones L, et al. Experiences among undocumented migrants accessing primary care in  
22 the United Kingdom: a qualitative study. *International journal of health services : planning,*  
23 *administration, evaluation* 2015;45(2):320-33. doi: 10.1177/0020731414568511 [published Online  
24 First: 2015/02/26]  
25
- 26 37. Casillas A, Bodenmann P, Epiney M, et al. The border of reproductive control: undocumented immigration  
27 as a risk factor for unintended pregnancy in Switzerland. *Journal of immigrant and minority health /*  
28 *Center for Minority Public Health* 2015;17(2):527-34. doi: 10.1007/s10903-013-9939-9 [published  
29 Online First: 2013/11/05]  
30
- 31 38. Wolff H, Epiney M, Lourenco AP, et al. Undocumented migrants lack access to pregnancy care and  
32 prevention. *BMC public health* 2008;8:93. doi: 10.1186/1471-2458-8-93 [published Online First:  
33 2008/03/28]  
34
- 35 39. Martin Y, Collet TH, Bodenmann P, et al. The lower quality of preventive care among forced migrants in a  
36 country with universal healthcare coverage. *Preventive medicine* 2014;59:19-24. doi:  
37 10.1016/j.ypmed.2013.11.006 [published Online First: 2013/11/23]  
38
- 39 40. Mipatrini D, Addario SP, Bertollini R, et al. Access to healthcare for undocumented migrants: analysis of  
40 avoidable hospital admissions in Sicily from 2003 to 2013. *European journal of public health*  
41 2017;27(3):459-64. doi: 10.1093/eurpub/ckx039 [published Online First: 2017/04/14]  
42
- 43 41. De Pietro C, Camenzind P, Sturny I, et al. Switzerland: Health System Review. *Health systems in transition*  
44 2015;17(4):1-288, xix. [published Online First: 2016/01/15]  
45
- 46 42. National platform for undocumented migrants access to care. Access to care for vulnerable populations in  
47 Switzerland 2014 [Available from: [https://www.sante-sans-](https://www.sante-sans-papiers.ch/FR/files/acces_aux_soins_des_vulnerables_web--4-.pdf)  
48 [papiers.ch/FR/files/acces\\_aux\\_soins\\_des\\_vulnerables\\_web--4-.pdf](https://www.sante-sans-papiers.ch/FR/files/acces_aux_soins_des_vulnerables_web--4-.pdf) accessed 30.12.2017].  
49
- 50 43. Wyssmüller C, Efonayi-Mäder D. Undocumented Migrants: their needs and strategies for accessing health  
51 care in Switzerland: Country Report on People & Practices Bern: Swiss Forum for Population and  
52 Migration Studies, 2011.  
53  
54  
55  
56  
57  
58  
59  
60

- 1  
2  
3 44. Geneva Canton Council. Opération Papyrus 2017 [Available from: [https://www.ge.ch/dossier/operation-](https://www.ge.ch/dossier/operation-papyrus)  
4 papyrus accessed 10.01.2017.  
5  
6 45. Kraler A, Reichel D, König A, et al. Feasibility Study on the Labour Market Trajectories of Regularised  
7 Immigrants within the European Union (REGANE I). Vienna: International Centre for Migration Policy  
8 Development (ICMPD), 2014.  
9  
10 46. Salmasi L, Pieroni L. Immigration policy and birth weight: Positive externalities in Italian law. *Journal of*  
11 *health economics* 2015;43:128-39. doi: 10.1016/j.jhealeco.2015.06.009  
12  
13 47. Venkataramani AS, Shah SJ, O'Brien R, et al. Health consequences of the US Deferred Action for Childhood  
14 Arrivals (DACA) immigration programme: a quasi-experimental study. *The Lancet Public health*  
15 2017;2(4):e175-e81. doi: 10.1016/s2468-2667(17)30047-6 [published Online First: 2017/12/19]  
16  
17 48. Siemons R, Raymond-Flesch M, Auerswald CL, et al. Coming of Age on the Margins: Mental Health and  
18 Wellbeing Among Latino Immigrant Young Adults Eligible for Deferred Action for Childhood Arrivals  
19 (DACA). *Journal of immigrant and minority health / Center for Minority Public Health* 2017;19(3):543-  
20 51. doi: 10.1007/s10903-016-0354-x [published Online First: 2016/02/08]  
21  
22 49. Hainmueller J, Lawrence D, Marten L, et al. Protecting unauthorized immigrant mothers improves their  
23 children's mental health. *Science* 2017;357(6355):1041-44. doi: 10.1126/science.aan5893 [published  
24 Online First: 2017/09/02]  
25  
26 50. Rechel B, Mladovsky P, Ingleby D, et al. Migration and health in an increasingly diverse Europe. *Lancet*  
27 2013;381(9873):1235-45. doi: [http://dx.doi.org/10.1016/S0140-6736\(12\)62086-8](http://dx.doi.org/10.1016/S0140-6736(12)62086-8)  
28  
29 51. Teunissen E, Van Bavel E, Van Den Driessen Mareeuw F, et al. Mental health problems of undocumented  
30 migrants in the Netherlands: A qualitative exploration of recognition, recording, and treatment by  
31 general practitioners. *Scandinavian journal of primary health care* 2015;33(2):82-90. doi:  
32 10.3109/02813432.2015.1041830 [published Online First: 2015/05/12]  
33  
34 52. Sebo P, Jackson Y, Haller DM, et al. Sexual and reproductive health behaviors of undocumented migrants in  
35 Geneva: a cross sectional study. *Journal of immigrant and minority health / Center for Minority Public*  
36 *Health* 2011;13(3):510-7. doi: 10.1007/s10903-010-9367-z [published Online First: 2010/07/14]  
37  
38 53. Schoevers MA, van den Muijsenbergh ME, Lagro-Janssen AL. Self-rated health and health problems of  
39 undocumented immigrant women in the Netherlands: a descriptive study. *Journal of public health*  
40 *policy* 2009;30(4):409-22. doi: 10.1057/jphp.2009.32 [published Online First: 2009/12/24]  
41  
42 54. Rondet C, Cornet P, Kaoutar B, et al. Depression prevalence and primary care among vulnerable patients at  
43 a free outpatient clinic in Paris, France, in 2010: results of a cross-sectional survey. *BMC family*  
44 *practice* 2013;14:151. doi: 10.1186/1471-2296-14-151  
45  
46 55. Castaneda H. Illegality as risk factor: a survey of unauthorized migrant patients in a Berlin clinic. *Soc Sci Med*  
47 2009;68(8):1552-60. doi: 10.1016/j.socscimed.2009.01.024 [published Online First: 2009/02/28]  
48  
49 56. Glick J. Connecting Complex Processes: A Decade of Research on Immigrant Families. *Journal of Marriage*  
50 *and Family* 2010;72(3):498-515. doi: 10.1111/j.1741-3737.2010.00715.x  
51  
52 57. Clark R, Glick J, Bures R. Immigrant Families Over the Life Course: Research Directions and Needs. *Journal of*  
53 *Family Issues* 2009;30(6):852-72. doi: 10.1177/0192513x09332162  
54  
55  
56  
57  
58  
59  
60

- 1  
2  
3 58. Commission on the social determinants of health. Closing the gap in a generation: health equity through  
4 action on the social determinants of health. Final Report of the Commission on Social Determinants of  
5 Health.: World Health Organization, 2008.  
6  
7  
8 59. Swiss Federal Bureau of Statistics. Measuring well-being 2018 [Available from:  
9 <https://www.bfs.admin.ch/bfs/fr/home/statistiques/themes-transversaux/mesure-bien-etre.html>  
10 accessed 07.03.2018.  
11  
12 60. OECD. Measuring Well-being and Progress: Well-being Research [Available from:  
13 <http://www.oecd.org/statistics/measuring-well-being-and-progress.htm> accessed 22.02.2018.  
14  
15 61. Fry P. Guest Editorial: Aging and Quality of Life (QOL)—The Continuing Search for Quality of Life Indicators.  
16 *The International Journal of Aging and Human Development* 2000;50(4):245-61. doi: 10.2190/44nj-  
17 k9yq-h44x-h3hv  
18  
19 62. Spini D, Bernardi L, Oris M. Vulnerability Across the Life Course. *Research in Human Development*  
20 2017;14(1):1-4. doi: 10.1080/15427609.2016.1268891  
21  
22 63. Cullati S, Kliegel M, Widmer E. Development of reserves over the life course and onset of vulnerability in  
23 later life. *Nature Human Behav* 2018;2:551-58.  
24  
25 64. Ware J, Jr., Kosinski M, Keller SD. A 12-Item Short-Form Health Survey: construction of scales and  
26 preliminary tests of reliability and validity. *Medical care* 1996;34(3):220-33. [published Online First:  
27 1996/03/01]  
28  
29 65. Benyamini Y, Idler Y. Community Studies Reporting Association between Self-Rated Health and  
30 Mortality:Additional Studies, 1995 to 1998. *Research on Aging* 1999;21(3):392-401. doi:  
31 10.1177/0164027599213002  
32  
33 66. DeSalvo KB, Bloser N, Reynolds K, et al. Mortality Prediction with a Single General Self-Rated Health  
34 Question: A Meta-Analysis. *Journal of general internal medicine* 2006;21(3):267-75. doi:  
35 10.1111/j.1525-1497.2005.00291.x  
36  
37 67. Tillmann R, Voorpostel M, Kuhn U, et al. The Swiss Household Panel Study: Observing social change since  
38 1999. *2016* 2016;7(1):15. doi: 10.14301/llcs.v7i1.360 [published Online First: 2016-01-28]  
39  
40 68. Swiss Federal Office of Public Health. Swiss Health Study 2017 [Available from:  
41 <https://www.bfs.admin.ch/bfs/fr/home/statistiques/sante/enquetes/sgb.html#1002476496> accessed  
42 03.08.2018.  
43  
44 69. Kroenke K, Spitzer RL, Williams JB, et al. The Patient Health Questionnaire Somatic, Anxiety, and Depressive  
45 Symptom Scales: a systematic review. *General hospital psychiatry* 2010;32(4):345-59. doi:  
46 10.1016/j.genhosppsy.2010.03.006 [published Online First: 2010/07/17]  
47  
48 70. Spitzer RL, Kroenke K, Williams JB, et al. A brief measure for assessing generalized anxiety disorder: the  
49 GAD-7. *Archives of internal medicine* 2006;166(10):1092-7. doi: 10.1001/archinte.166.10.1092  
50 [published Online First: 2006/05/24]  
51  
52 71. Christina M, E. JS. The measurement of experienced burnout. *Journal of Organizational Behavior*  
53 1981;2(2):99-113. doi: doi:10.1002/job.4030020205  
54  
55  
56  
57  
58  
59  
60

1  
2  
3 72. Mollayeva T, Thurairajah P, Burton K, et al. The Pittsburgh sleep quality index as a screening tool for sleep  
4 dysfunction in clinical and non-clinical samples: A systematic review and meta-analysis. *Sleep medicine*  
5 *reviews* 2016;25:52-73. doi: 10.1016/j.smrv.2015.01.009 [published Online First: 2015/07/15]  
6  
7

#### 8 Acknowledgements 9

10 Authors wish to thank the NGOs involved with the regularization policy which helped developping and  
11 implementing this study.  
12  
13

#### 14 Authors contribution 15

16  
17 YJ conceived the study, is the co-principal investigator, drafted the protocol and wrote the manuscript.  
18 CBJ conceived the study, is the co-principal investigator, drafted the protocol and proofread the manuscript.  
19 GFL, AD, SC and DC contributed to the study conception and protocol and proofread the manuscript.  
20 PB, PC, IG, and HW reviewed the protocol and proofread the manuscript.  
21  
22 All authors approved the version to be published and are responsible for its accuracy.  
23  
24

#### 25 Funding 26

27 The Parchemins study is supported by Geneva University School of Medicine, Fondation Safra, Geneva  
28 Directorate of Health, Geneva Directorate of Social Affairs, Swiss Federal Office of Public Health, the NCCR  
29 LIVES Project and the Swiss National Fund for Scientific Research (grant 100017\_182208).  
30  
31

32  
33 Competing interest: none  
34

35 Word count: 3970  
36

#### 37 Figure caption 38

39 Figure 1: Study flow chart  
40  
41  
42  
43  
44  
45  
46  
47  
48  
49  
50  
51  
52  
53  
54  
55  
56  
57  
58  
59  
60

1  
2  
3  
4  
5  
6  
7  
8  
9  
10  
11  
12  
13  
14  
15  
16  
17  
18  
19  
20  
21  
22  
23  
24  
25  
26  
27  
28  
29  
30  
31  
32  
33  
34  
35  
36  
37  
38  
39  
40  
41  
42  
43  
44  
45  
46  
47  
48  
49  
50  
51  
52  
53  
54  
55  
56  
57  
58  
59  
60

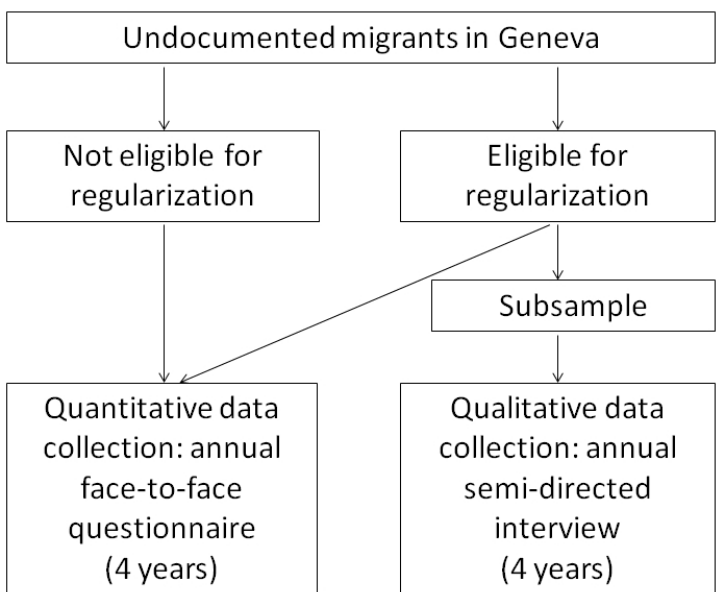

254x190mm (96 x 96 DPI)

# BMJ Open

## Impact of legal status change on undocumented migrants' health and well-being (Parchemins): protocol of a 4-year prospective mixed-methods study.

|                                 |                                                                                                                                                                                                                                                                                                                                                                                                                                                                                                                                                                                                                                                                                                                                                                                                                                                                                                                                                                                                                                                                                                                                                                           |
|---------------------------------|---------------------------------------------------------------------------------------------------------------------------------------------------------------------------------------------------------------------------------------------------------------------------------------------------------------------------------------------------------------------------------------------------------------------------------------------------------------------------------------------------------------------------------------------------------------------------------------------------------------------------------------------------------------------------------------------------------------------------------------------------------------------------------------------------------------------------------------------------------------------------------------------------------------------------------------------------------------------------------------------------------------------------------------------------------------------------------------------------------------------------------------------------------------------------|
| Journal:                        | <i>BMJ Open</i>                                                                                                                                                                                                                                                                                                                                                                                                                                                                                                                                                                                                                                                                                                                                                                                                                                                                                                                                                                                                                                                                                                                                                           |
| Manuscript ID                   | bmjopen-2018-028336.R2                                                                                                                                                                                                                                                                                                                                                                                                                                                                                                                                                                                                                                                                                                                                                                                                                                                                                                                                                                                                                                                                                                                                                    |
| Article Type:                   | Protocol                                                                                                                                                                                                                                                                                                                                                                                                                                                                                                                                                                                                                                                                                                                                                                                                                                                                                                                                                                                                                                                                                                                                                                  |
| Date Submitted by the Author:   | 08-Apr-2019                                                                                                                                                                                                                                                                                                                                                                                                                                                                                                                                                                                                                                                                                                                                                                                                                                                                                                                                                                                                                                                                                                                                                               |
| Complete List of Authors:       | Jackson, Yves; Hopitaux Universitaires de Geneve, Service de médecine de premier recours<br>Courvoisier, Delphine; Hopitaux Universitaires de Geneve, Department of general internal medicine, rehabilitation and geriatrics<br>Duvoisin, Aline; Universite de Geneve, Institut de recherche sociologique<br>Ferro-Luzzi, Giovanni; Haute Ecole de Gestion de Geneve; Universite de Geneve, Geneva School of Economic and Management<br>Bodenmann, Patrick; University of Lausanne, Departement of Ambulatory Care and Community Medicine<br>Chauvin, Pierre; Inserm, UMRS 1136, Pierre Louis Institute of Epidemiology and Public Health, Department of Social Epidemiology; Université Pierre et Marie Curie-Paris6 , UMRS 1136<br>Guessous, Idris; Hopitaux Universitaires de Geneve, Service de médecine de premier recours<br>Wolf, Hans; Hopitaux Universitaires de Geneve, Service de médecine pénitentiaire<br>Cullati, Stéphane; Universite de Geneve, Institut de recherche sociologique; Universite de Geneve, Swiss NCCR LIVES<br>Burton-Jeangros, Claudine; Universite de Geneve, Institut de recherche sociologique; Universite de Geneve, Swiss NCCR LIVES |
| <b>Primary Subject Heading</b>: | Public health                                                                                                                                                                                                                                                                                                                                                                                                                                                                                                                                                                                                                                                                                                                                                                                                                                                                                                                                                                                                                                                                                                                                                             |
| Secondary Subject Heading:      | Health policy, Sociology, Epidemiology                                                                                                                                                                                                                                                                                                                                                                                                                                                                                                                                                                                                                                                                                                                                                                                                                                                                                                                                                                                                                                                                                                                                    |
| Keywords:                       | undocumented migrant, migration, health, wellbeing, regularization, PUBLIC HEALTH                                                                                                                                                                                                                                                                                                                                                                                                                                                                                                                                                                                                                                                                                                                                                                                                                                                                                                                                                                                                                                                                                         |
|                                 |                                                                                                                                                                                                                                                                                                                                                                                                                                                                                                                                                                                                                                                                                                                                                                                                                                                                                                                                                                                                                                                                                                                                                                           |

SCHOLARONE™  
Manuscripts

1  
2  
3 **Impact of legal status change on undocumented migrants' health and well-being (Parchemins): protocol of a**  
4 **4-year prospective mixed-methods study.**  
5

6  
7 Yves Jackson<sup>1</sup>, Delphine S. Courvoisier<sup>2</sup>, Aline Duvoisin<sup>3</sup>, Giovanni Ferro-Luzzi<sup>4,5</sup>, Patrick Bodenmann<sup>6</sup>, Pierre  
8 Chauvin<sup>7</sup>, Idris Guessous<sup>1</sup>, Hans Wolff<sup>8</sup>, Stéphane Cullati<sup>1,2</sup>, Claudine Burton-Jeangros<sup>3,9</sup>  
9

10  
11 <sup>1</sup> Division of primary care medicine, Geneva University Hospitals and University of Geneva, Switzerland

12  
13 <sup>2</sup> Department of general internal medicine, rehabilitation and geriatrics, Geneva University Hospitals,  
14 Switzerland

15  
16 <sup>3</sup> Institute of sociological research, University of Geneva, Switzerland

17  
18 <sup>4</sup> Geneva school of business administration, HES-SO, University of Applied Sciences and Arts Western  
19 Switzerland

20  
21 <sup>5</sup> Geneva school of economics and management, University of Geneva, Switzerland

22  
23 <sup>6</sup> Vulnerable population center, Department of ambulatory care and community medicine, Lausanne University  
24 Hospital & University of Lausanne, Switzerland

25  
26 <sup>7</sup> Department of social epidemiology, Sorbonne University, Paris, France

27  
28 <sup>8</sup> Division of prison health, Geneva University Hospitals and University of Geneva, Switzerland

29  
30 <sup>9</sup> Swiss NCCR 'LIVES—Overcoming Vulnerability: Life Course Perspectives', University of Geneva, Switzerland  
31

32 **Contact**

33 Yves Jackson

34 Division of primary care medicine Geneva University Hospitals

35 Rue Gabrielle Perret-Gentils 6, 1211 Geneva, Switzerland

36 Phone: +41 22 372 96 56

37 Yves.jackson@hcuge.ch  
38  
39

40  
41 **Abstract**

42 **Introduction**

43  
44  
45 Migrants without residency permit, known as undocumented, tend to live in precarious conditions and to be  
46 exposed to an accumulation of adverse determinants of health. Only scarce evidence exists on the social,  
47 economic and living conditions-related factors influencing their health status and wellbeing. No study has  
48 assessed the impact of legal status regularization. The Parchemins study is the first prospective mixed-methods  
49 study aiming at measuring the impact on health and well-being of a regularization policy on undocumented  
50 migrants in Europe.  
51  
52

53  
54  
55 **Methods and analysis**

56  
57  
58 The Parchemins study will compare self-rated health and satisfaction with life in a group of adult  
59 undocumented migrants who qualify for applying for a residency permit (intervention group) with a group of  
60



1  
2  
3 undocumented migrants who lack one or more eligibility criteria for regularization (control group) in Geneva  
4 Canton, Switzerland. Asylum seekers are not included in this study. The total sample will include 400  
5 participants. Data collection will consist of standardized questionnaires complemented by semi-directed  
6 interviews in a sub-sample (n=38) of migrants qualifying for regularization. The baseline data will be collected  
7 just before or during the regularization and participants will subsequently be followed-up yearly for three  
8 years. The quantitative part will explore variables about health (i.e. health status, occupational health, health  
9 seeking behaviors, access to care, healthcare utilization), wellbeing (measured by satisfaction with different  
10 dimensions of life), living conditions (i.e. employment, accommodation, social support) and economic situation  
11 (income, expenditures). Several confounders including sociodemographic characteristics and migration history  
12 will be collected. The qualitative part will explore longitudinally the experience of change in legal status at  
13 individual and family levels.  
14  
15  
16  
17  
18  
19

#### 20 Ethics and dissemination

21  
22  
23 This study was approved by the Ethics Committee of Geneva, Switzerland. All participants provided informed  
24 consent. Results will be shared with undocumented migrants and disseminated in scientific journals and  
25 conferences. Fully anonymized data will be available to researchers.  
26  
27

#### 28 Strengths and limitations of this study

- 29  
30  
31 - The prospective and mixed-methods approaches will allow generating a comprehensive understanding of  
32 factors operating across time on health and wellbeing.  
33  
34 - The qualitative part will provide further insights into individual and family experiences in parting with their  
35 undocumented status and facing the new challenges that regularization entails.  
36  
37 - The main limitation will be the risk of attrition in the control group considering the harsh and unpredictable  
38 living context of such migrants.  
39  
40 - The study is designed to minimize such risk by selecting undocumented migrants having a relatively stable  
41 personal situation.  
42  
43  
44  
45

46 Keywords: undocumented migrants, irregular migration, health, wellbeing, regularization  
47

#### 48 Introduction

49  
50  
51 Undocumented or irregular migration is defined as “*movements that takes place outside the regulatory norms*  
52 *of the sending, transit and receiving countries*”.<sup>1</sup> It results from overstaying after temporary residency permit  
53 expiration, asylum claim refusal or entering the country without valid migration documentation.<sup>1,2</sup> In absence  
54 of valid methods of identification, figures provided for undocumented migrants are mainly theoretical and  
55 estimated by cross-referencing different sources. Recent valid data is generally lacking. The International  
56 Organization for Migration estimated that there were 20-30 million undocumented migrants worldwide in  
57 2010.<sup>3</sup> According to the Pew Hispanic Center, the number of undocumented migrants from Latin America in the  
58  
59  
60

1  
2  
3 United States increased from 8.4 in 2000 to 11.1 million in 2011.<sup>4</sup> Europe hosted an estimated 1.9 to 3.8 million  
4 of such migrants in 2008 and the most recent estimates point to 180'000-520'000 and 58'000-105'000 of them  
5 in Germany and Switzerland, respectively.<sup>5-7</sup>  
6  
7

### 8 *A vulnerable population* 9

10 The lack of legal residency permit interacts with social, political and economic factors to create multi-  
11 dimensional vulnerability among undocumented migrants.<sup>8,9</sup> In most European countries, they face significant  
12 post-migration difficulties in the context of restrictive immigration policies and lack of labor protection<sup>2,10</sup>.  
13 Many are employed in low-skills and precarious 3D (dangerous, dirty and degrading) jobs and are exposed to  
14 abuse, exploitation and occupational hazards.<sup>11-14</sup> Access to other basic commodities and services such as  
15 housing, education and training, food and legal protection in case of harm or abuse is usually arduous and  
16 precarious.<sup>10,15</sup>  
17  
18  
19  
20  
21

22 When compared to the resident and the regular migrants' populations, self-rated physical and mental health is  
23 consistently and significantly poorer among undocumented migrants in Europe.<sup>16,17</sup> In a study conducted in 11  
24 countries, 23% of women and 34% of men, including those in the youngest age groups, rated their health as  
25 poor or very poor.<sup>12</sup> Undocumented migrants present high prevalence of chronic conditions in primary care  
26 settings, notably of metabolic, cardiovascular and psychiatric origins.<sup>16,18-22</sup> Several infectious diseases are more  
27 prevalent than in the resident population which relates more to geographic origins than to the legal status.<sup>23,24</sup>  
28 No comparative data exist on the mortality rate ratio of undocumented migrants compared to the general  
29 population but external (including accidents and suicides) and circulatory causes of death were 3.6 and 2.2  
30 times more prevalent in a sample of such migrants than in the general Swedish population, respectively.<sup>25</sup>  
31  
32  
33  
34  
35  
36

37 Undocumented migrants in Europe face limited opportunities to respond to their healthcare needs with  
38 barriers to healthcare operating at different levels.<sup>12,26-28</sup> Legal entitlement to receive medical care within the  
39 public healthcare system varies considerably between countries. A majority of countries restrict access to  
40 emergency situations exclusively.<sup>29,30</sup> Non-governmental organizations (NGOs) play a subsidiary role but  
41 services provided are generally of limited extent and do not cover the full range of health needs.<sup>12</sup> Access to  
42 costly treatments in the absence of formal entitlement to healthcare is frequently restricted, which entails  
43 significant health consequences, notably in the context of severe chronic diseases such as HIV/AIDS infection.<sup>31</sup>  
44  
45  
46  
47  
48  
49  
50  
51  
52  
53  
54  
55  
56  
57  
58  
59  
60

<sup>32</sup> At the health service level, communication barriers, the perceived lack of specific skills and practical  
difficulties encountered by healthcare workers contribute to restrict the extent and quality of care.<sup>33,34</sup> At the  
migrants' level, fear of denunciation, direct costs at charge and a lack of knowledge about how to navigate the  
health system impede adequate use of health services.<sup>12,16,35,36</sup> These factors negatively impact the provision of  
health promoting and preventive interventions such as immunization, birth-control counseling, prenatal care  
and screening procedures.<sup>37-39</sup> Undocumented migrants have a higher rate of preventable hospitalizations  
compared to populations with full access to care and are less likely to receive preventive care.<sup>39,40</sup>

1  
2  
3 In Switzerland, the 26 cantons have a large autonomy and have the responsibility to supervise and manage  
4 their public healthcare system.<sup>41</sup> Undocumented migrants are legally entitled to purchase the mandatory basic  
5 health insurance (which grants access to standard healthcare) but lack of awareness, financial and  
6 administrative barriers as well as fear of denunciation contribute to the estimated 10-20% insurance coverage.  
7  
8  
9 <sup>42</sup><sup>43</sup> Swiss cantons have implemented different policies to bridge this access gap. Geneva and Vaud provide  
10 health services within the public healthcare system which are complemented by other services (food, shelter)  
11 provided by NGOs.<sup>42</sup> Yet, previous studies showed that undocumented migrants in Geneva tend to delay  
12 seeking care, notably for preventive interventions.<sup>38</sup>  
13  
14  
15

### 16 *Regularization policies*

17 Several regularization programs have been implemented in Europe and an estimated 1.8 million  
18 undocumented migrants were granted a residency permit between 2002 and 2008.<sup>2</sup> Switzerland has never  
19 implemented large-scale programs but a handful of individual applications (mainly through NGOs or lawyers'  
20 services) have been successful to varying degrees depending on the canton. Residency permits have been  
21 granted mainly for humanitarian motives, in case of severe medical needs, long stay and satisfactory  
22 integration, absence of criminal record and financial autonomy.<sup>5</sup> In 2017, the Geneva Canton implemented a  
23 two-year pilot regularization program (Operation Papyrus) aiming at granting one-year residency permits to  
24 undocumented migrants meeting the following criteria: a) stay of 10 years for individuals or 5 years for families  
25 with school-aged children; b) basic French proficiency; c) sufficient financial resources; d) lack of criminal  
26 record other than related to the residency permit.<sup>44</sup> The program integrates civil society actors (workers'  
27 unions, NGOs) that act as gatekeepers between undocumented migrants and the Canton authorities, and  
28 support them with the administrative process leading to regularization.  
29  
30  
31  
32  
33  
34  
35

36  
37 The impact of regularization policy on undocumented migrants' health, well-being, living conditions and  
38 economic situation has rarely been studied in Europe. Scarce evidence shows improved access to legal  
39 employment, social welfare and insurances with better housing and educational opportunities.<sup>45</sup> Negative  
40 effects included enhanced professional competition associated with the lack of recognition of pre-migration  
41 professional qualifications. In Italy, the 2007 amnesty policy was associated with a 1.2 to 2.7% point decline in  
42 low birth weight prevalence within the migrant population eligible for regularization.<sup>46</sup> In the USA, the Deferred  
43 Action for Children Arrival act (DACA) implemented in 2012 allowed around 800'000 undocumented young  
44 people to be temporarily regularized. Studies found a decline in psychological distress, improvements in self-  
45 esteem, wellbeing, and social support and pointed to beneficial trans-generational effects on children mental  
46 health.<sup>47-49</sup> No study has prospectively explored the impact of legal status change on health and wellbeing while  
47 taking into accounts undocumented migrants living and working conditions.  
48  
49  
50  
51  
52  
53

### 54 *Gaps in the existing literature*

55  
56 While the development of knowledge about asylum seekers and refugees' health is accelerating, research on  
57 undocumented migrants' health lags behind.<sup>28</sup><sup>50</sup> The number and quality of studies being limited, there are  
58  
59  
60

1  
2  
3 some major gaps in the current knowledge about their health and wellbeing and their relationship to living and  
4 economic conditions.  
5

6  
7 Most studies have been conducted in healthcare settings, thus entailing a systematic selection bias restricting  
8 their generalizability, and are cross-sectional or retrospective, which hampers the ability to measure changes  
9 over time and to identify causal relationships.<sup>12 16 17 26 35 38 51-55</sup> Most studies are monodisciplinary, rely on a  
10 single methodology, typically measure a limited range of health indicators and usually overlook the wellbeing  
11 dimension. These limitations restrict the ability to foster a comprehensive understanding of the complexity and  
12 the dynamics of health and wellbeing evolution after regularization in a longitudinal perspective taking into  
13 account the interactions between medical, social, legal and economic factors.  
14  
15

16  
17  
18 A second gap pertains to the lack of in-depth understanding of the impact of legal status change  
19 (regularization) on the health and living conditions of individual migrants but also of the rest of their family.<sup>13 16</sup>  
20  
21  
22  
23  
24  
25  
26  
27  
28  
29  
30  
31  
32  
33  
34  
35  
36  
37  
38  
39  
40  
41  
42  
43  
44  
45  
46  
47  
48  
49  
50  
51  
52  
53  
54  
55  
56  
57  
58  
59  
60

### *Theoretical perspectives*

To address the limitations of the available research, our research design is supported by two main theoretical perspectives allowing assessing the role of regularization.

- (1) The perspective of wellbeing and quality of life (QoL) is typically articulated with the social determinants of health framework promoted among others by the World Health Organization (WHO). Indeed the model developed by the WHO maps the multiple factors that affect equity in both health and wellbeing.<sup>58</sup> Growing interest for wellbeing is evidenced by the Organization for Economic Co-operation and Development (OCDE) framework that associates objective indicators of material conditions with QoL indicators in different domains (including housing, education, income, etc.).<sup>59 60</sup> This framework is particularly relevant to assess the situation of newly regularized migrants, along the idea that QoL reflects the gap between individuals' actual situation and that to which they aspire.<sup>61</sup> We can hypothesize that undocumented migrants' wellbeing might be higher than that of Swiss residents with similar levels of resources.
- (2) The dynamic approach of the life course will allow examining undocumented migrants' trajectories both retrospectively and prospectively. Considering how much stress and uncertainty the absence of legal documents generates, regularization represents a major transition. At the same time, the acquisition of a legal status can bring mixed consequences, including both positive (elimination of the deportation risk, better housing) and negative (new financial constraints like taxes, competition on the labor market)

1  
2  
3 influences. The life course perspective will be used to assess how regularization modifies the balance  
4 between vulnerability, resources and reserves.<sup>62 63</sup>  
5  
6

### 7 *Objectives of the study and research questions*

8  
9 This study aims to measure how regularization impacts the health and wellbeing of undocumented migrants in  
10 Geneva Canton. To reach this goal, five research questions have been formulated:  
11

- 12  
13 1. What are the living conditions of undocumented migrants living in Geneva?
- 14  
15 2. What are the health status, including the mental and somatic dimensions, and well-being of  
16 undocumented migrants living in Geneva?
- 17  
18 3. What are the health-seeking behaviors, healthcare utilization, including emergency services, and  
19 renouncement to medical care, among undocumented migrants living in Geneva?
- 20  
21 4. What is the impact of regularization on their health and well-being and its relationship with changes in  
22 living conditions?
- 23  
24 5. How do contextual factors shape the experience of transitioning towards legality for undocumented  
25 individuals and families?  
26

### 27 *Methods and data analysis*

#### 28 *Design*

29  
30 This prospective mixed-methods observational study compares a group of undocumented migrants undergoing  
31 regularization with a group of migrants not eligible for regularization. A nested qualitative longitudinal study  
32 focuses on a sub-sample of individuals undergoing regularization. The data collection started in 2017 and will  
33 end in 2021.  
34  
35  
36  
37  
38

39 The research plan is organized to respond to the set of research questions developed on the following  
40 hypotheses: i) undocumented migrants endure deleterious living and economic conditions compared to the  
41 general population which has an impact on their health and wellbeing; ii) regularization of the legal status  
42 impacts on health and wellbeing; iii) differences in health and wellbeing after regularization are mediated by  
43 changes in living and economic conditions and iv) regularization may cause vulnerability in health and living  
44 conditions.  
45  
46  
47  
48

#### 49 *Setting*

50  
51 This study takes place in Geneva Canton located in French-speaking Western Switzerland. The resident  
52 population is 500'000 including 10-15'000 undocumented migrants.  
53  
54

#### 55 *Eligibility criteria*

#### 56 *Inclusion criteria*

57  
58  
59  
60

1  
2  
3 Migrants aged  $\geq 18$  years, originating from countries outside the European Union or European Free Trade  
4 Association, living in Geneva without a valid residency permit (undocumented) for at least 3 years, who plan to  
5 stay in Geneva at least 3 more years, have not registered as asylum seekers, are eligible to participate. They are  
6 categorized into two groups: (1) those undergoing the regularization process or who have been regularized for  
7 less than three months (intervention group) and (2) those who do not meet the regularization eligibility criteria  
8 or are unwilling to apply for regularization (control group).  
9  
10  
11

#### 12 Exclusion criteria

13  
14  
15 The inability to hold a basic conversation in one of the languages spoken by investigators (French, Spanish,  
16 Portuguese, English, Albanian, and Italian) is the only exclusion criteria.  
17  
18

#### 19 Intervention

20  
21 Participants eligible for legal status regularization (intervention group) will receive a residency permit within 3-  
22 6 months after the submission of their application to the Canton authorities. This process will take place during  
23 the first year of data collection. The information about permit acceptance will be collected through participants  
24 and the NGOs. This permit is renewable annually. Outcomes  
25  
26  
27

#### 28 Primary outcome measure

29  
30  
31 The primary outcome is self-rated health. It will be measured by comparing intra-group differences at baseline  
32 and after 3 years. Yearly measurements will allow for observing fluctuations in such differences. This item will  
33 be measured using the SF-12 question 1, a 5-points Likert scale<sup>64</sup>, whose large-scale use also allows for  
34 comparing the results with other groups of population. We selected the main outcome for its prognostic value  
35 in terms of morbidity and mortality.<sup>65 66</sup>  
36  
37  
38

#### 39 Secondary outcome measure

40  
41  
42 The secondary outcome consists of self-reported satisfaction with current life as measured through the  
43 dimensions of living condition and economic situation at baseline and after three years. Each domain will be  
44 measured every year with a single question using a 10-points Likert scale ranging from 0=absolutely not  
45 satisfied to 10=absolutely satisfied. This will allow to measure key dimensions of the OCDE wellbeing  
46 framework and provide comparison with the resident population.<sup>60</sup>  
47  
48  
49

#### 50 Additional variables under investigations

51  
52  
53 The quantitative part explores four domains, i.e. (1) personal and family characteristics, (2) health, (3) living  
54 conditions and (4) employment and economic situation. Table 1 presents the variables under study, to the  
55 exception of the main outcomes. These variables will be used as predictors for the main outcomes. The  
56 questionnaire was designed to provide data that allow for comparisons with the general population living in  
57  
58  
59  
60

1  
2  
3 Switzerland, by using questions from population surveys such as the Household Panel Study or the Swiss Health  
4 Survey.<sup>67 68</sup> For specific domains, we use validated measurement tools selected for their validity and reliability  
5  
6 in non-clinical settings. We apply the PHQ-9 and GAD-7 scales for the screening of depression and anxiety,  
7  
8 respectively.<sup>69 70</sup> Occupational mental health is assessed with the Maslach Burnout Inventory Test, specifically  
9  
10 the emotional exhaustion dimension.<sup>71</sup> We use The Pittsburg Sleep Quality Index Sleep Quality to evaluate  
11  
12 sleep.<sup>72</sup> We used validated translations of these scales when available but not all questionnaires were validated  
13  
14 in all the languages used in this study. The questionnaire was pretested with a sample of participants (n=5),  
15  
16 allowing for iterative modifications.  
17  
18  
19

20 Table 1: variables by domain  
21  
22  
23  
24  
25  
26  
27  
28  
29  
30  
31  
32  
33  
34  
35  
36  
37  
38  
39  
40  
41  
42  
43  
44  
45  
46  
47  
48  
49  
50  
51  
52  
53  
54  
55  
56  
57  
58  
59  
60

| Personal and family characteristics                                                                                                                                                                                                           | Health                                                                                                                                            | Living conditions                                                                                                                      | Employment and economic situation                                                                                  |
|-----------------------------------------------------------------------------------------------------------------------------------------------------------------------------------------------------------------------------------------------|---------------------------------------------------------------------------------------------------------------------------------------------------|----------------------------------------------------------------------------------------------------------------------------------------|--------------------------------------------------------------------------------------------------------------------|
| Sociodemographic characteristics*** : sex; age; country of birth; nationality                                                                                                                                                                 | Anthropomorphic measures: weight (kg)***; height (cm)***                                                                                          | Housing : number of rooms*; number of people sharing accommodation***; quality of environment*; type of lease contract***; rent price* | Professional activity : number of employers*; sector of employment***; number of working hours***; working permit* |
| Family composition*** : marital status ; number of children                                                                                                                                                                                   | Somatic health : chronic diseases*/***; accidents***; injuries; current treatment**                                                               | Household composition : relation with household members***                                                                             | Working conditions : penibility**; exposure to hazards **                                                          |
| Children characteristics : gender ; age ; country of birth ; country of residence; current education                                                                                                                                          | Mental health: anxiety ; depression** <sup>69 70</sup> ; current treatment                                                                        | Discrimination** : at the workplace; in public spaces; in healthcare settings                                                          | Income : individual level***; household level***; state subsidies*                                                 |
| Migration history: reason for leaving country of origin; date of departure from country of origin; date of arrival in Switzerland; previous and current residency status in Switzerland; visit to country of origin; regularization procedure | Health behaviors : sleep <sup>72</sup> ; physical activity***                                                                                     | Social support: satisfaction with social relationships**                                                                               | Financial situation : ability to cover unexpected expense; remittance to country of origin                         |
| Education : number of years at school; highest degree attained***; place of education                                                                                                                                                         | Access to care : health insurance; deductibles**; cost of premium; State-funded deductions*                                                       | Integration into local life : participation to activities**; French fluency                                                            |                                                                                                                    |
| Professional qualification : professional training; employment record before migration                                                                                                                                                        | Utilization of the healthcare system: number of ambulatory and emergency room visits**; hospitalization***; affiliation with a family physician** |                                                                                                                                        |                                                                                                                    |
|                                                                                                                                                                                                                                               | Renunciation to healthcare utilization: reasons; type of care                                                                                     |                                                                                                                                        |                                                                                                                    |
|                                                                                                                                                                                                                                               | Occupational health** ; emotional exhaustion <sup>71</sup> ; professional injuries**                                                              |                                                                                                                                        |                                                                                                                    |

\* Variables of the Swiss Household Panel; \*\* variables of the Swiss Health Survey

#### Qualitative part

The following themes will be covered during the semi-directed interviews: marital and family dynamics, including relationships with family members not living in Switzerland; experience of the regularization process



1  
2  
3 and its positive and negative implications; perspectives and aspirations for the future; for parents: educational  
4 issues and aspirations for their children's future. The interview guide has been pretested with 5 persons.  
5

#### 6 7 Participant timeline

8  
9 Quantitative data will be collected by questionnaire at baseline and repeated annually during the following  
10 three year (4 waves in total) (Figure 1). Questionnaires will be filled face-to-face with participants in the  
11 intervention and the control groups. We restricted the follow-up to three years assuming that most changes in  
12 the domains under study will occur during the first two years, followed by a more stable situation. This  
13 restriction also aims to reduce the attrition rate. Qualitative interviews are conducted at baseline (year 1) and  
14 then every year for three years. They are conducted at a different time from the quantitative data collection to  
15 avoid participants' fatigue.  
16  
17  
18  
19

#### 20 21 Sample size

22  
23 Considering an effect size of 0.3 for the main health outcome (self-rated health), a type 1 error of 0.05 and a  
24 power of 0.8, the total sample size is 352, rounded up to 400 to account for the possible drop-out of  
25 participants over the follow-up.  
26  
27

28 The purposive qualitative nested study sampling includes 38 participants selected from the intervention group  
29 of undocumented migrants eligible for regularization. The sample size is estimated to be sufficient to reach  
30 data saturation. To ensure the diversity of the sample, participants are recruited on the respectively absence or  
31 presence of children, while ensuring the diversity of the sample regarding origins, age and gender.  
32  
33  
34

#### 35 36 Recruitment

37  
38 According to the Geneva authorities, 1'000-2'000 undocumented migrants could be eligible for the  
39 regularization policy Recruitment is based on two strategies. First, undocumented migrants are informed about  
40 the study by personal contacts at NGOs acting at gatekeepers for "Operation Papyrus", during public meetings  
41 held in the community, at dedicated health centers attending for undocumented migrants, through leaflets and  
42 a Facebook page. A direct phone line is accessible during office hours to respond to all enquiries. People  
43 interested in participating contact the investigators who present the study information and consent forms and  
44 engage in the first questionnaire passing if agreement is provided.  
45  
46  
47  
48

49 The second strategy is based on phone contacts with potential participants identified in partner NGOs registries  
50 of undocumented migrants. During the initial call, investigators present the study and offer to organize a first  
51 meeting to provide more in-depth information. In the absence of response, potential participants are recalled  
52 up to five times.  
53  
54

#### 55 56 Retention

57  
58 Undocumented migrants are highly mobile and can be lost during the follow-up. In order to account for this  
59 risk, the sample size has been increased by 12.5%. All participants undergoing the first round of data collection  
60

1  
2  
3 will be contacted yearly for the subsequent waves. In order to enhance retention into the study, the following  
4 strategies are implemented: a) providing a material compensation (worth 10-15 euros) and information about  
5 available health and administrative services after each questionnaire passation; b) discussing the need for and  
6 gaining acceptance for the next contact after one year upon each encounter; c) recording a secondary phone  
7 number or email address to ensure participants are accessible. Moreover, partner NGOs inform communities of  
8 the importance of the follow-up. Contact for the following data collection will be made by phone with up to  
9 five recalls and use of email messaging in case of non-response. In order to facilitate participation and  
10 retention into the study, the field investigators can move to the preferred participant's location to pass the  
11 questionnaire.

12  
13  
14  
15  
16  
17  
18 Participants may withdraw from the study for any reason at any time. In case of withdrawal or loss to follow-  
19 up, all data will be included until the last participants' questionnaire for the analysis.

#### 20 21 22 Quantitative data collection

23  
24 The questionnaire is administered face-to-face with participants of both groups at their preferred location in  
25 the community. It is available in the four most frequent languages (Spanish, Portuguese, French, English)  
26 spoken by undocumented migrants in Geneva. We acknowledge there may be a potential limitation related to  
27 the limited language skills of the subsample of participants not completely fluent in one of these four  
28 languages. Data are recorded on a mobile tablet using Sphinx mobile® software (LeSphinx, France) and are  
29 immediately transferred on a secure server. Interviewers are trained and supervised by a senior staff during  
30 their first interviews.

#### 31 32 33 34 35 Qualitative data collection

36  
37 In the qualitative section, data are collected in semi-directed interviews with undocumented migrants in the  
38 process of regularization. They are conducted in French, Spanish and English. Interviews are tape recorded and  
39 fully transcribed.

#### 40 41 42 43 Statistical analysis

44  
45 In a first step, the two groups (intervention vs. control) will be compared on all characteristics, using univariate  
46 analysis such as Fisher exact test for categorical variables and Wilcoxon rank sum test for continuous variables.  
47 This will allow determining the quality of the control group selection.

48  
49  
50  
51 To assess the evolution of health outcomes and living conditions over time, we will use multilevel linear models  
52 (logistic, Poisson, or Gaussian as appropriate depending on the specific outcome), including legal status  
53 (regularized vs. control) and adjusting for baseline characteristics to further account for group differences.  
54 Multilevel models account for the repeated nature of the data. To specifically focus on the different  
55 trajectories, these models will include both a random intercept and a random slope over time. Note that for  
56 rare dichotomous outcomes, we will probably need to restrict the number of covariates due to a number of  
57 events per variables below five per predictor. In that case, we will use two strategies. First, we will apply  
58  
59  
60

propensity score adjustment, using all previously described covariates to compute the propensity score. Second, because the propensity score may not capture the importance of some confounders and lead to residual confounding, we will use a least absolute shrinkage and selection operator (LASSO) regression to determine which covariates are the most useful, before using only those covariates for adjustment.

#### Qualitative data analysis

Thematic analyses of the transcriptions will be conducted with Atlas.ti ([www.atlasti.com](http://www.atlasti.com)), combining a set of codes defined along the interview guide and new codes inductively generated over the course of the analysis.

#### Ethics and dissemination

This study was approved by the Ethics Committee of Geneva Canton, Switzerland (CCER 2017-00897). All participants will provide informed consent. Results will be shared with migrant communities and NGOs supporting undocumented migrants and disseminated in scientific journals and in conferences. Fully anonymized data will be made available to researchers.

#### Patient and Public Involvement

The development of the research questions, outcome measures and investigation strategies were informed by discussions conducted with community organizations active with undocumented migrants and with undocumented migrant patients seen by the main investigator (YJ). Patients were not directly involved in the design of the study but feedbacks from participants after the questionnaire pre-testing were used to adapt its content. One of the field investigators is a former undocumented migrant. The results will be disseminated to study participants by two channels: a) regular public meetings, the first of which took place on November 6<sup>th</sup> 2018 and through partner community organizations.

#### Discussion

This mixed methods study aims to measure the impact of legal status change on health and wellbeing of undocumented migrants taking in account living, employment and economic conditions. It will produce the first comprehensive and longitudinal evaluation of a policy response to irregular migration in Europe. The interdisciplinary approach warrants the generation of rich data about a complex phenomenon. Considering the contemporary political and scientific interest in issues pertaining to migration worldwide, this study is at the forefront to provide original, interdisciplinary and comprehensive evidence about an ill-researched population. The results will influence how such issues are framed and discussed at local, national and international levels. Data will specifically inform about unmet health needs, expectations and resources of undocumented migrants, therefore allowing for guiding clinical and public health strategies in Switzerland and similar countries. This may allow for an opportunity to mitigate inequalities in health outcomes and in access to health services. Most importantly, this study will provide a safe environment to give a voice to a silent and underserved population.

#### References

1. International Organization for Migration. World migration report 2018. Geneva: IOM, 2017.
2. Kraler A, Rogoz M. Irregular migration in the European Union since the turn of the millennium – development, economic background and discussion. Database on Irregular Migration, Working paper 11/2011. Vienna: International Centre for Migration Policy Development (ICMPD), 2011.
3. International Organization for Migration. World Migration Report 2010. Geneva: IOM, 2010.
4. Pew Hispanic Centre. A Nation of Immigrants. A Portrait of the 40 Million, Including 11 Million Unauthorized. Washington: Pew Research Centre, 2013.
5. Morlok M, Oswald A, Meier H, et al. Les sans-papiers en Suisse en 2015. Bâle: BSS, 2016.
6. Vogel D, Kovacheva V, Prescott H. The size of the irregular migrant population in the European Union - counting the uncountable? *Int Migr* 2011;49(5):78-96.
7. Vogel D. Update report Germany: Estimated number of irregular foreign residents in Germany (2014). Database on Irregular Migration. Bremen: University of Bremen, 2015.
8. Willen SS. Migration, "illegality," and health: mapping embodied vulnerability and debating health-related deservingness. *Soc Sci Med* 2012;74(6):805-11. doi: 10.1016/j.socscimed.2011.10.041
9. Fleischman Y, Willen SS, Davidovitch N, et al. Migration as a social determinant of health for irregular migrants: Israel as case study. *Soc Sci Med* 2015;147:89-97. doi: 10.1016/j.socscimed.2015.10.046
10. Chauvin P, Simonnot N, Douay C, et al. Access to healthcare for people facing multiple vulnerability factors in 27 cities across 10 countries. Report on the social and medical data gathered in 2013 in eight European countries, Turkey and Canada. Paris: International network of Médecins du monde, 2014.
11. Benach J, Muntaner C, Delclos C, et al. Migration and "low-skilled" workers in destination countries. *PLoS Med* 2011;8(6):e1001043.
12. Chauvin P, Parizot I, Simonnot N. Access to healthcare for undocumented migrants in 11 European countries. In: healthcare. Eooat, ed. Paris: Médecins du Monde, 2009.
13. Sousa E, Agudelo-Suarez A, Benavides FG, et al. Immigration, work and health in Spain: the influence of legal status and employment contract on reported health indicators. *Int J Public Health* 2010;55(5):443-51. doi: 10.1007/s00038-010-0141-8
14. Ahonen EQ, Porthe V, Vazquez ML, et al. A qualitative study about immigrant workers' perceptions of their working conditions in Spain. *J Epidemiol Community Health* 2009;63(11):936-42. doi: 10.1136/jech.2008.077016
15. Aragona M, Pucci D, Mazzeti M, et al. Post-migration living difficulties as a significant risk factor for PTSD in immigrants: a primary care study. *Italian J Public Health* 2012;9(3):e7525-1.
16. Kuehne A, Huschke S, Bullinger M. Subjective health of undocumented migrants in Germany - a mixed methods approach. *BMC Public Health* 2015;15:926. doi: 10.1186/s12889-015-2268-2
17. D'Egidio V, Mipatrini D, Massetti AP, et al. How are the undocumented migrants in Rome? Assessment of quality of life and its determinants among migrant population. *J Public Health* 2017;39(3):440-46. doi: 10.1093/pubmed/fdw056
18. Jackson Y, Paignon A, Wolff H, et al. Health of undocumented migrants in primary care in Switzerland. *PLoS One* 2018;13 (7): e0201313

- 1  
2  
3 19. Jackson Y, Castillo S, Hammond P, et al. Metabolic, mental health, behavioural and socioeconomic  
4 characteristics of migrants with Chagas disease in a non-endemic country. *Trop Med Int Health*  
5 2012;17(5):595-603. doi: 10.1111/j.1365-3156.2012.02965.x  
6  
7
- 8 20. Lindert J, Ehrenstein OS, Priebe S, et al. Depression and anxiety in labor migrants and refugees--a  
9 systematic review and meta-analysis. *Soc Sci Med* 2009;69(2):246-57. doi:  
10 10.1016/j.socscimed.2009.04.032  
11
- 12 21. Myhrvold T, Smastuen MC. The mental healthcare needs of undocumented migrants: an exploratory  
13 analysis of psychological distress and living conditions among undocumented migrants in Norway. *J*  
14 *Clin Nurs* 2017;26(5-6):825-39. doi: 10.1111/jocn.13670  
15
- 16 22. van de Sande JSO, van den Muijsenbergh M. Undocumented and documented migrants with chronic  
17 diseases in Family Practice in the Netherlands. *Fam Pract* 2017;34(6):649-55. doi:  
18 10.1093/fampra/cmz032  
19
- 20 23. Wolff H, Janssens JP, Bodenmann P, et al. Undocumented migrants in Switzerland: geographical origin  
21 versus legal status as risk factor for tuberculosis. *J Immigr Minor Health* 2010;12(1):18-23. doi:  
22 10.1007/s10903-009-9271-6  
23
- 24 24. Jackson Y, Getaz L, Wolff H, et al. Prevalence, clinical staging and risk for blood-borne transmission of  
25 Chagas disease among Latin American migrants in Geneva, Switzerland. *PLoS Neglect Trop Dis*  
26 2010;4(2):e592. doi: 10.1371/journal.pntd.0000592  
27
- 28 25. Wahlberg A, Kallestal C, Lundgren A, et al. Causes of death among undocumented migrants in Sweden,  
29 1997-2010. *Glob Health Action* 2014;7:24464. doi: 10.3402/gha.v7.24464  
30
- 31 26. Woodward A, Howard N, Wolffers I. Health and access to care for undocumented migrants living in the  
32 European Union: a scoping review. *Health Policy Plan* 2014;29(7):818-30. doi: 10.1093/heapol/czt061  
33
- 34 27. Suess A, Ruiz Perez I, Ruiz Azarola A, et al. The right of access to health care for undocumented migrants: a  
35 revision of comparative analysis in the European context. *Eur J Public Health* 2014;24(5):712-20. doi:  
36 10.1093/eurpub/cku036  
37
- 38 28. De Vito E, De Waure C, Specchia M, et al. Public health aspects of migrant health: a review of the evidence  
39 on health status for undocumented migrants in the European Region. Copenhagen: World Health  
40 Organisation (WHO) Regional Office for Europe,, 2016.  
41
- 42 29. Cuadra CB. Right of access to health care for undocumented migrants in EU: a comparative study of  
43 national policies. *Eur J Public Health* 2012;22(2):267-71. doi: 10.1093/eurpub/ckr049  
44
- 45 30. Karl-Trummer U, Novak-Zezula S, Metzler B. Access to health care for undocumented migrants in the EU: A  
46 first landscape of NowHereland. *EuroHealth* 2010;16(1):13-16.  
47
- 48 31. Perez-Molina JA, Pulido Ortega F. [Assessment of the impact of the new health legislation on illegal  
49 immigrants in Spain: the case of human immunodeficiency virus infection]. *Enferm Infecc Microbiol*  
50 *Clin* 2012;30(8):472-8. doi: 10.1016/j.eimc.2012.07.004  
51
- 52 32. Deblonde J, Sasse A, Del Amo J, et al. Restricted access to antiretroviral treatment for undocumented  
53 migrants: a bottle neck to control the HIV epidemic in the EU/EEA. *BMC Public Health* 2015;15:1228.  
54 doi: 10.1186/s12889-015-2571-y  
55  
56  
57  
58  
59  
60

- 1  
2  
3 33. Dauvrin M, Lorant V, Sandhu S, et al. Health care for irregular migrants: pragmatism across Europe: a  
4 qualitative study. *BMC Res Notes* 2012;5:99. doi: 10.1186/1756-0500-5-99  
5  
6 34. Hudelson P, Perron NJ, Perneger TV. Measuring physicians' and medical students' attitudes toward caring  
7 for immigrant patients. *Eval Health Prof* 2010;33(4):452-72. doi: 10.1177/0163278710370157  
8  
9 35. Schoevers MA, Loeffen MJ, van den Muijsenbergh ME, et al. Health care utilisation and problems in  
10 accessing health care of female undocumented immigrants in the Netherlands. *Int J Public Health*  
11 2010;55(5):421-8. doi: 10.1007/s00038-010-0151-6  
12  
13 36. Poduval S, Howard N, Jones L, et al. Experiences among undocumented migrants accessing primary care in  
14 the United Kingdom: a qualitative study. *Int J Health Serv* 2015;45(2):320-33. doi:  
15 10.1177/0020731414568511  
16  
17 37. Casillas A, Bodenmann P, Epiney M, et al. The border of reproductive control: undocumented immigration  
18 as a risk factor for unintended pregnancy in Switzerland. *J Immigr Minor Health* 2015;17(2):527-34.  
19 doi: 10.1007/s10903-013-9939-9  
20  
21 38. Wolff H, Epiney M, Lourenco AP, et al. Undocumented migrants lack access to pregnancy care and  
22 prevention. *BMC Public Health* 2008;8:93. doi: 10.1186/1471-2458-8-93  
23  
24 39. Martin Y, Collet TH, Bodenmann P, et al. The lower quality of preventive care among forced migrants in a  
25 country with universal healthcare coverage. *Prev Med* 2014;59:19-24. doi:  
26 10.1016/j.ypmed.2013.11.006  
27  
28 40. Mipatrini D, Addario SP, Bertollini R, et al. Access to healthcare for undocumented migrants: analysis of  
29 avoidable hospital admissions in Sicily from 2003 to 2013. *Eur J Public Health* 2017;27(3):459-64. doi:  
30 10.1093/eurpub/ckx039  
31  
32 41. De Pietro C, Camenzind P, Sturny I, et al. Switzerland: Health System Review. *Health System Transit*  
33 2015;17(4):1-288, xix.  
34  
35 42. National platform for undocumented migrants access to care. Access to care for vulnerable populations in  
36 Switzerland 2014 [Available from: [https://www.sante-sans-  
37 papiers.ch/FR/files/acces\\_aux\\_soins\\_des\\_vulnerables\\_web--4-.pdf](https://www.sante-sans-papiers.ch/FR/files/acces_aux_soins_des_vulnerables_web--4-.pdf) accessed 30.12.2017.  
38  
39 43. Wyssmüller C, Efonayi-Mäder D. Undocumented Migrants: their needs and strategies for accessing health  
40 care in Switzerland: Country Report on People & Practices Bern: Swiss Forum for Population and  
41 Migration Studies, 2011.  
42  
43 44. Geneva Canton Council. Opération Papyrus 2017 [Available from: [https://www.ge.ch/dossier/operation-  
44 papyrus](https://www.ge.ch/dossier/operation-papyrus) accessed 10.01.2017.  
45  
46 45. Kraler A, Reichel D, König A, et al. Feasibility Study on the Labour Market Trajectories of Regularised  
47 Immigrants within the European Union (REGANE I). Vienna: International Centre for Migration Policy  
48 Development (ICMPD), 2014.  
49  
50 46. Salmasi L, Pieroni L. Immigration policy and birth weight: Positive externalities in Italian law. *J Health econ*  
51 2015;43:128-39. doi: 10.1016/j.jhealeco.2015.06.009  
52  
53  
54  
55  
56  
57  
58  
59  
60

- 1  
2  
3 47. Venkataramani AS, Shah SJ, O'Brien R, et al. Health consequences of the US Deferred Action for Childhood  
4 Arrivals (DACA) immigration programme: a quasi-experimental study. *Lancet Public Health*  
5 2017;2(4):e175-e81. doi: 10.1016/s2468-2667(17)30047-6  
6  
7 48. Siemons R, Raymond-Flesch M, Auerswald CL, et al. Coming of Age on the Margins: Mental Health and  
8 Wellbeing Among Latino Immigrant Young Adults Eligible for Deferred Action for Childhood Arrivals  
9 (DACA). *J Immigr Minor Health* 2017;19(3):543-51. doi: 10.1007/s10903-016-0354-x  
10  
11 49. Hainmueller J, Lawrence D, Marten L, et al. Protecting unauthorized immigrant mothers improves their  
12 children's mental health. *Science* 2017;357(6355):1041-44. doi: 10.1126/science.aan5893  
13  
14 50. Rechel B, Mladovsky P, Ingleby D, et al. Migration and health in an increasingly diverse Europe. *Lancet*  
15 2013;381(9873):1235-45. doi: [http://dx.doi.org/10.1016/S0140-6736\(12\)62086-8](http://dx.doi.org/10.1016/S0140-6736(12)62086-8)  
16  
17 51. Teunissen E, Van Bavel E, Van Den Driessen Mareeuw F, et al. Mental health problems of undocumented  
18 migrants in the Netherlands: A qualitative exploration of recognition, recording, and treatment by  
19 general practitioners. *Scand J Prim Health Care* 2015;33(2):82-90. doi:  
20 10.3109/02813432.2015.1041830  
21  
22 52. Sebo P, Jackson Y, Haller DM, et al. Sexual and reproductive health behaviors of undocumented migrants in  
23 Geneva: a cross sectional study. *J Immigr Minor Health* 2011;13(3):510-7. doi: 10.1007/s10903-010-  
24 9367-z  
25  
26 53. Schoevers MA, van den Muijsenbergh ME, Lagro-Janssen AL. Self-rated health and health problems of  
27 undocumented immigrant women in the Netherlands: a descriptive study. *J Public Health Policy*  
28 2009;30(4):409-22. doi: 10.1057/jphp.2009.32  
29  
30 54. Rondet C, Cornet P, Kaoutar B, et al. Depression prevalence and primary care among vulnerable patients at  
31 a free outpatient clinic in Paris, France, in 2010: results of a cross-sectional survey. *BMC Fam Pract*  
32 2013;14:151. doi: 10.1186/1471-2296-14-151  
33  
34 55. Castaneda H. Illegality as risk factor: a survey of unauthorized migrant patients in a Berlin clinic. *Soc Sci Med*  
35 2009;68(8):1552-60. doi: 10.1016/j.socscimed.2009.01.024  
36  
37 56. Glick J. Connecting Complex Processes: A Decade of Research on Immigrant Families. *J Marriage Fam*  
38 2010;72(3):498-515. doi: 10.1111/j.1741-3737.2010.00715.x  
39  
40 57. Clark R, Glick J, Bures R. Immigrant Families Over the Life Course: Research Directions and Needs. *Journal*  
41 *Fam Issue* 2009;30(6):852-72. doi: 10.1177/0192513x09332162  
42  
43 58. Commission on the social determinants of health. Closing the gap in a generation: health equity through  
44 action on the social determinants of health. Final Report of the Commission on Social Determinants of  
45 Health.: World Health Organization, 2008.  
46  
47 59. Swiss Federal Bureau of Statistics. Measuring well-being 2018 [Available from:  
48 <https://www.bfs.admin.ch/bfs/fr/home/statistiques/themes-transversaux/mesure-bien-etre.html>  
49 accessed 07.03.2018.  
50  
51 60. OECD. Measuring Well-being and Progress: Well-being Research [Available from:  
52 <http://www.oecd.org/statistics/measuring-well-being-and-progress.htm> accessed 22.02.2018.  
53  
54  
55  
56  
57  
58  
59  
60

- 1  
2  
3 61. Fry P. Aging and Quality of Life (QOL)—The Continuing Search for Quality of Life Indicators. *Int J Aging*  
4 *Human Dev* 2000;50(4):245-61. doi: 10.2190/44nj-k9yq-h44x-h3hv  
5  
6 62. Spini D, Bernardi L, Oris M. Vulnerability Across the Life Course. *Res Human Dev* 2017;14(1):1-4. doi:  
7 10.1080/15427609.2016.1268891  
8  
9 63. Cullati S, Kliegel M, Widmer E. Development of reserves over the life course and onset of vulnerability in  
10 later life. *Nature Human Behav* 2018;2:551-58.  
11  
12 64. Ware J, Jr., Kosinski M, Keller SD. A 12-Item Short-Form Health Survey: construction of scales and  
13 preliminary tests of reliability and validity. *Med Care* 1996;34(3):220-33.  
14  
15 65. Benyamini Y, Idler Y. Community Studies Reporting Association between Self-Rated Health and  
16 Mortality:Additional Studies, 1995 to 1998. *Res Aging* 1999;21(3):392-401. doi:  
17 10.1177/0164027599213002  
18  
19 66. DeSalvo KB, Bloser N, Reynolds K, et al. Mortality Prediction with a Single General Self-Rated Health  
20 Question: A Meta-Analysis. *J Gen Intern Med* 2006;21(3):267-75. doi: 10.1111/j.1525-  
21 1497.2005.00291.x  
22  
23 67. Tillmann R, Voorpostel M, Kuhn U, et al. The Swiss Household Panel Study: Observing social change since  
24 1999. *2016* 2016;7(1):15. doi: 10.14301/llcs.v7i1.360 [published Online First: 2016-01-28]  
25  
26 68. Swiss Federal Office of Public Health. Swiss Health Study 2017 [Available from:  
27 <https://www.bfs.admin.ch/bfs/fr/home/statistiques/sante/enquetes/sgb.html#1002476496> accessed  
28 03.08.2018.  
29  
30 69. Kroenke K, Spitzer RL, Williams JB, et al. The Patient Health Questionnaire Somatic, Anxiety, and Depressive  
31 Symptom Scales: a systematic review. *Gen Hosp Psychiatry* 2010;32(4):345-59. doi:  
32 10.1016/j.genhosppsy.2010.03.006  
33  
34 70. Spitzer RL, Kroenke K, Williams JB, et al. A brief measure for assessing generalized anxiety disorder: the  
35 GAD-7. *Arch Intern Med* 2006;166(10):1092-7. doi: 10.1001/archinte.166.10.1092  
36  
37 71. Maslach C, Jackson S. The measurement of experienced burnout. *J Organizational Behav* 1981;2(2):99-113.  
38 doi:10.1002/job.4030020205  
39  
40 72. Mollayeva T, Thurairajah P, Burton K, et al. The Pittsburgh sleep quality index as a screening tool for sleep  
41 dysfunction in clinical and non-clinical samples: A systematic review and meta-analysis. *Sleep Med Rev*  
42 2016;25:52-73. doi: 10.1016/j.smrv.2015.01.009  
43  
44  
45  
46  
47

#### Acknowledgements

48  
49  
50 Authors wish to thank the NGOs involved with the regularization policy which helped developing and  
51 implementing this study.  
52

#### Authors contribution

53  
54  
55 YJ conceived the study, is the co-principal investigator, drafted the protocol and wrote the manuscript.  
56  
57 CBJ conceived the study, is the co-principal investigator, drafted the protocol and proofread the manuscript.  
58  
59 GFL, AD, SC and DC contributed to the study conception and protocol and proofread the manuscript.  
60



1  
2  
3 PB, PC, IG, and HW reviewed the protocol and proofread the manuscript.

4 All authors approved the version to be published and are responsible for its accuracy.  
5  
6

#### 7 Funding

8 The Parchemins study is supported by Geneva University School of Medicine, Fondation Safra, Geneva  
9 Directorate of Health, Geneva Directorate of Social Affairs, Swiss Federal Office of Public Health, the NCCR  
10 LIVES Project and the Swiss National Fund for Scientific Research (grant 100017\_182208).  
11  
12  
13

14 Competing interest: none  
15

16 Word count: 3970  
17

18 Figure caption

19 Figure 1: Study flow chart  
20  
21  
22  
23  
24  
25  
26  
27  
28  
29  
30  
31  
32  
33  
34  
35  
36  
37  
38  
39  
40  
41  
42  
43  
44  
45  
46  
47  
48  
49  
50  
51  
52  
53  
54  
55  
56  
57  
58  
59  
60

For peer review only

1  
2  
3  
4  
5  
6  
7  
8  
9  
10  
11  
12  
13  
14  
15  
16  
17  
18  
19  
20  
21  
22  
23  
24  
25  
26  
27  
28  
29  
30  
31  
32  
33  
34  
35  
36  
37  
38  
39  
40  
41  
42  
43  
44  
45  
46  
47  
48  
49  
50  
51  
52  
53  
54  
55  
56  
57  
58  
59  
60

Figure 1 : Study flow chart

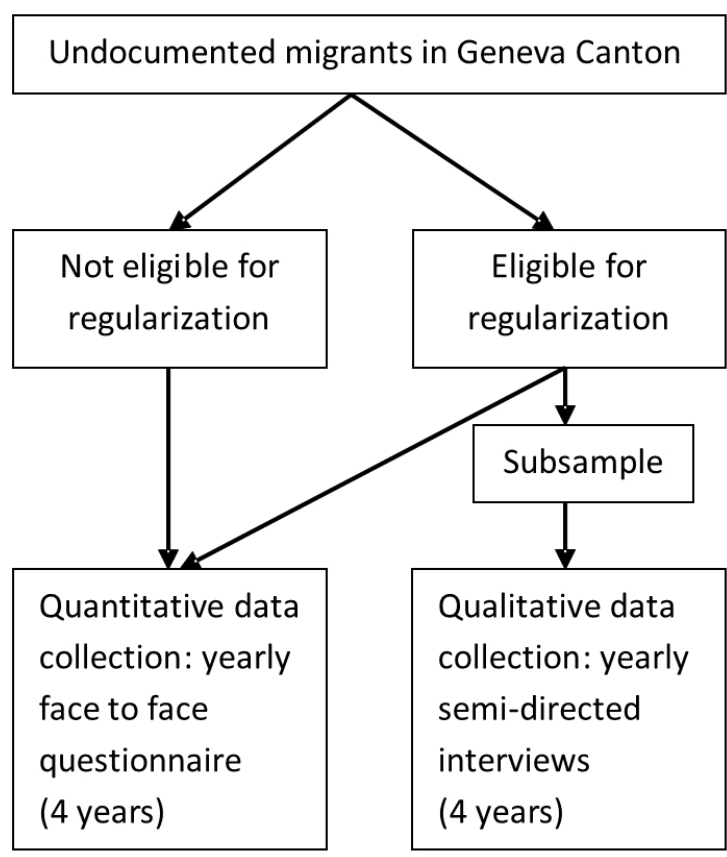

254x254mm (96 x 96 DPI)
